# Supplementary material for: Natural Products of Marine Macroalgae from South Eastern Australia, with Emphasis on the Port Phillip Bay and Heads Regions of Victoria
Source: PubMed Central journal article supplement (PMC7143075; doi:10.3390/md18030142), 2020-02-28
Supplement: marinedrugs-18-00142-s001.pdf [file marinedrugs-18-00142-s001.pdf]

# Natural Products of Marine Macroalgae from South Eastern Australia, with Emphasis on the Port Phillip Bay and Heads Regions of Victoria

James Lever<sup>1</sup>, Robert Brkljača<sup>1,2</sup>, Gerald Kraft<sup>3,4</sup> and Sylvia Urban<sup>1\*</sup>

<sup>1</sup> School of Science (Applied Chemistry and Environmental Science), RMIT University, GPO Box 2476V Melbourne, VIC 3001, Australia.

<sup>2</sup> Monash Biomedical Imaging, Monash University, Clayton, VIC, Australia.

<sup>3</sup> School of Biosciences, University of Melbourne, Parkville, Victoria 3010, Australia.

<sup>4</sup> Tasmania Herbarium, College Road, Sandy Bay, Tasmania 7015, Australia.

## Supporting Information

S1. Taxonomic Revisions.

S2. Diterpenes Isolated from Green Algae.

S3. Sesquiterpenes Isolated from Green Algae.

S4. Cyclic Geranyl Acetones Isolated from Green Algae.

S5. Steroids/Sterols Isolated from Green Algae.

S6. Miscellaneous Compounds Isolated from Green Algae.

S7. Biological Activity Summary of Green Algae (Chlorophyta).

S8. Tocotrienols Isolated from Brown Algae.

S9. Monoterpenes Isolated from Brown Algae.

S10. Prenylated Phenols Isolated from Brown Algae.

S11. Meroditerpenoids Isolated from Brown Algae.

S12. Sesquiterpenes and Monoterpenes Isolated from Brown Algae.

S13. Diterpenoids Isolated from Brown Algae.

S14. Diterpenoids Isolated from Brown Algae (continued).

S15. Diterpenoids Isolated from Brown Algae (continued).

S16. Steroids/sterols Isolated from Brown Algae.

S17. Lipids and Polyenes Isolated from Brown Algae.

S18. Oxylipids and Epoxylipids Isolated from Brown Algae.

S19. Phloroglucinols Isolated from Brown Algae.

- S20. Phenols/phenolic acids/resorcinols Isolated from Brown Algae.
- S21. Miscellaneous Compounds Isolated from Brown Algae.
- S22. Biological Activity Summary of Brown Algae (Ochrophyta).
- S23. Halogenated Monoterpenes and Parguerenes Isolated from Red Algae.
- S24. Chamigrenes Isolated from Red Algae.
- S25. Laurenes Isolated from Red Algae.
- S26. Sesquiterpenes Isolated from Red Algae
- S27. Lauroxocanes Isolated from Red Algae
- S28. Polyhalogenated Indoles Isolated from Red Algae.
- S29. Polyhalogenated Hydrocarbons Isolated from Red Algae.
- S30. Halogenated Furanones Isolated from Red Algae.
- S31. Steroids Isolated from Red Algae.
- S32. Miscellaneous Classes of Compounds Isolated from Red Algae.
- S33. Biological Activity Summary of Red Algae (Rhodophyta).

---

\*Corresponding author. Tel: +61 3 9925 3376

*E-mail address:* [sylvia.urban@rmit.edu.au](mailto:sylvia.urban@rmit.edu.au) (S. Urban)

## S1. Taxonomic Revisions

| Previous taxonomy           | Revised taxonomy                |
|-----------------------------|---------------------------------|
| <i>Sargassum decipiens</i>  | <i>Phyllotricha decipiens</i>   |
| <i>Grateloupia filicina</i> | <i>Grateloupia subpectinata</i> |
| <i>Laurencia elata</i>      | <i>Corynecladia elata</i>       |

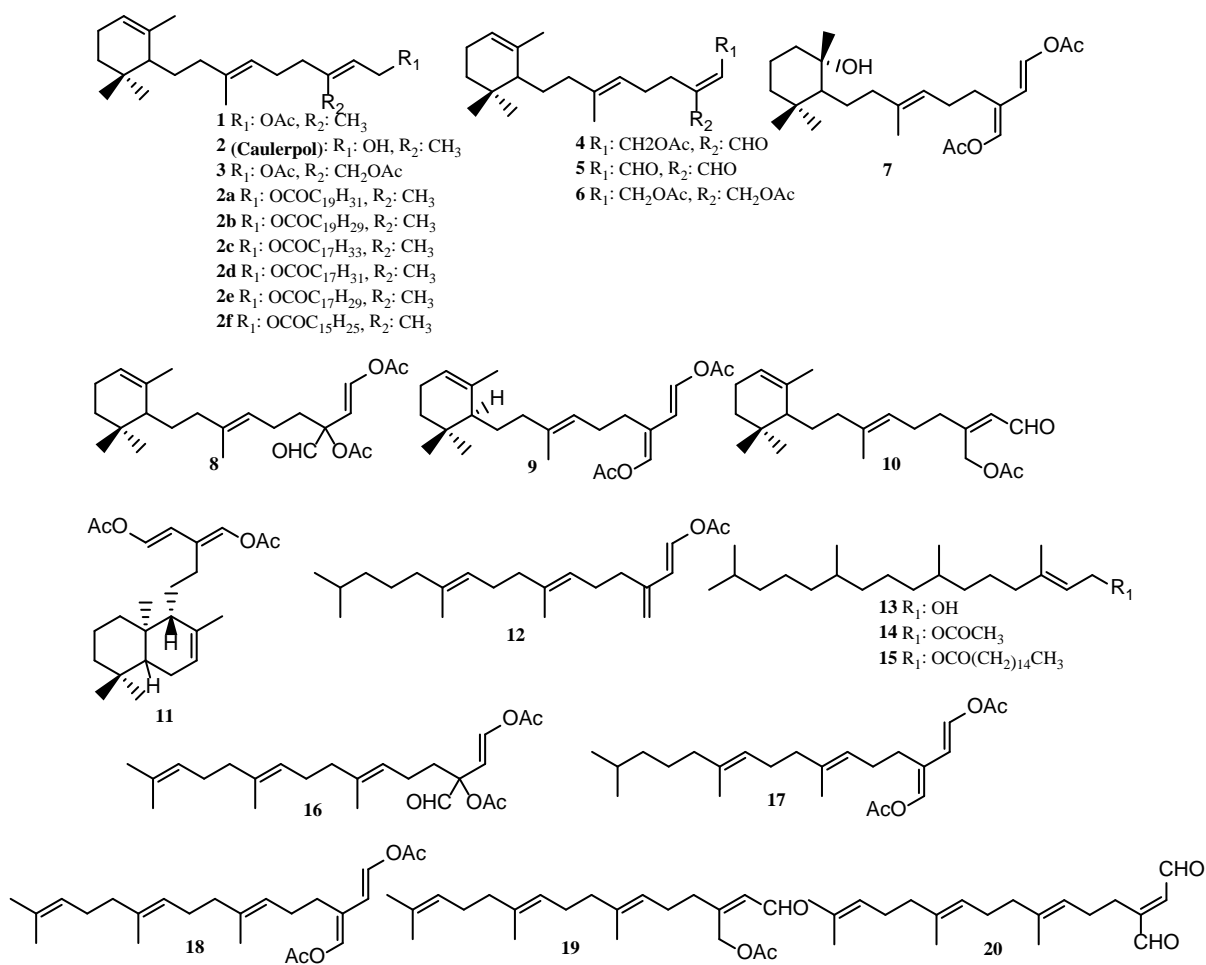

## S2. Diterpenes Isolated from Green Algae.

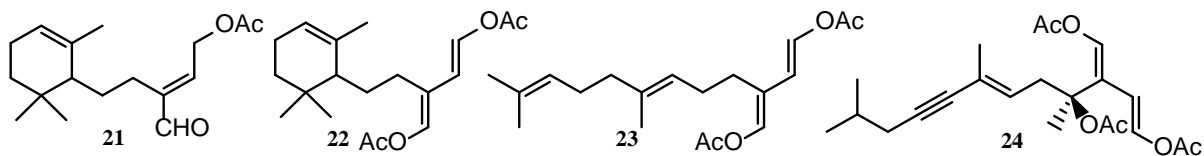

S3. Sesquiterpenes Isolated from Green Algae.

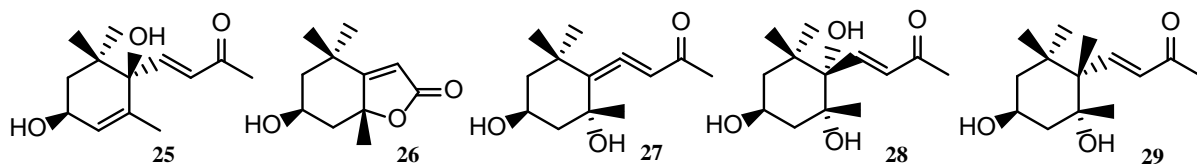

S4. Cyclic Geranyl Acetones Isolated from Green Algae.

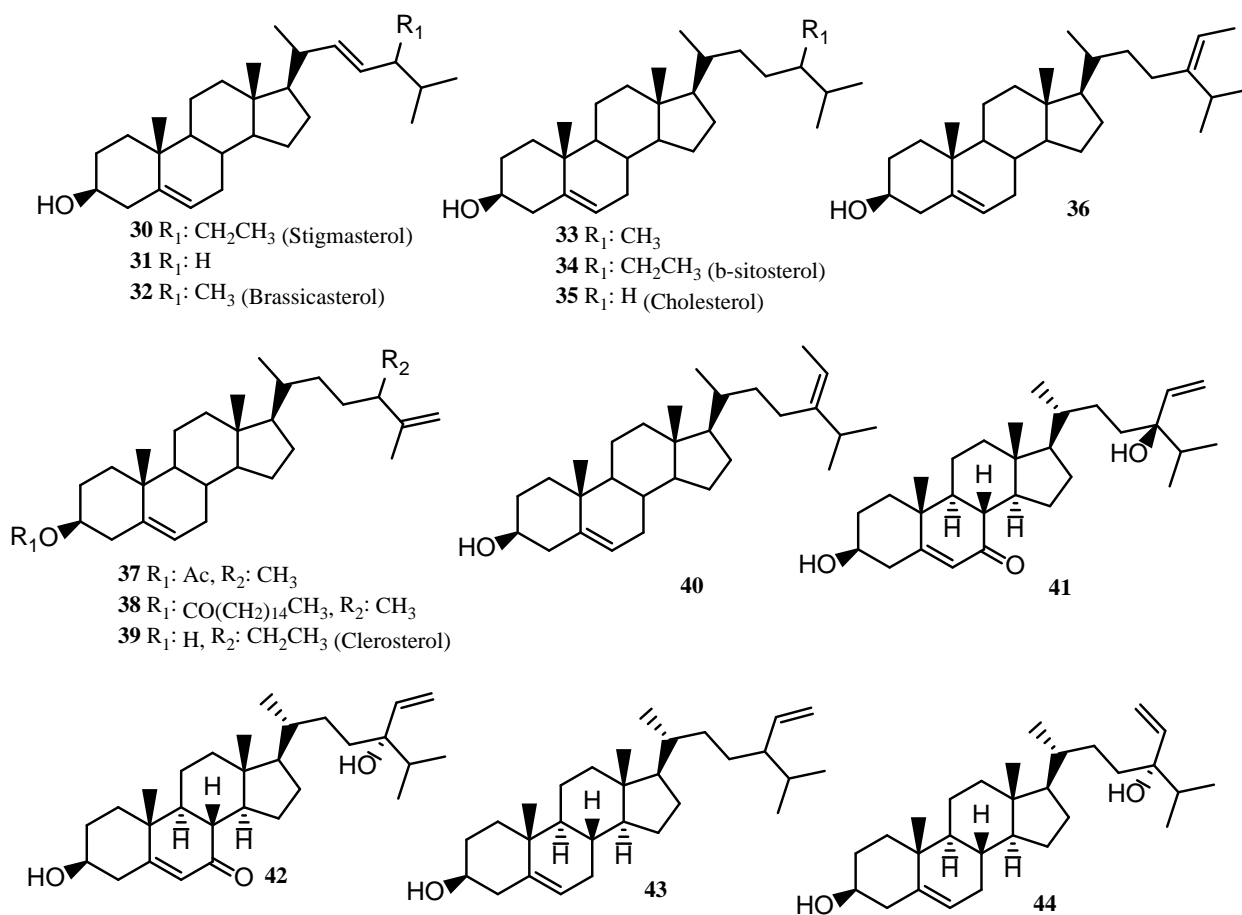

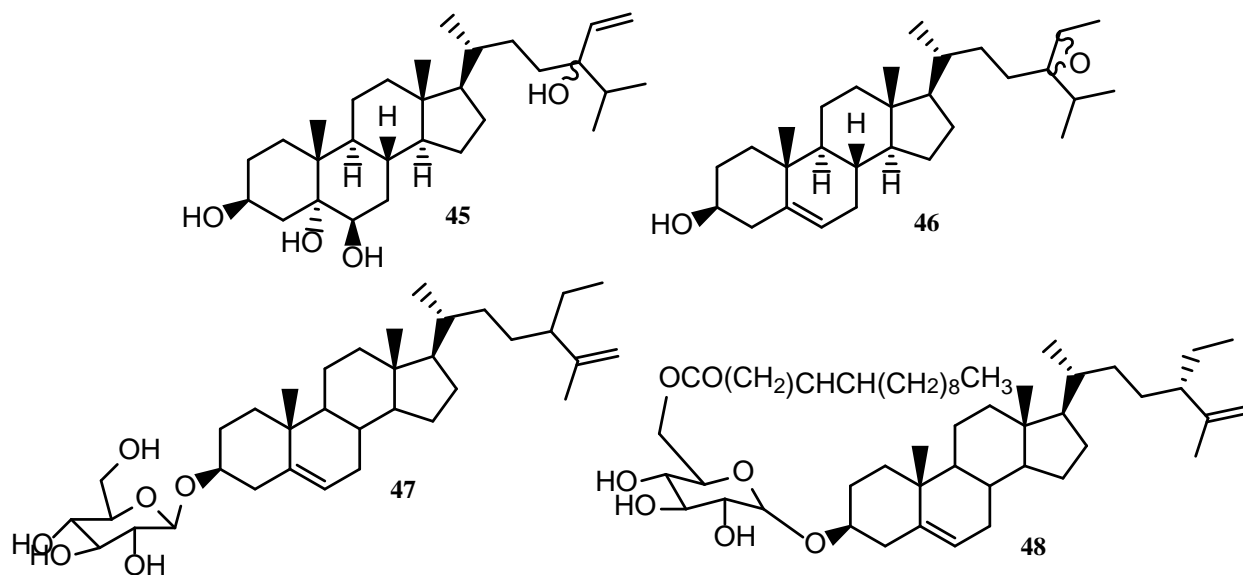

S5. Steroids/Sterols Isolated from Green Algae.

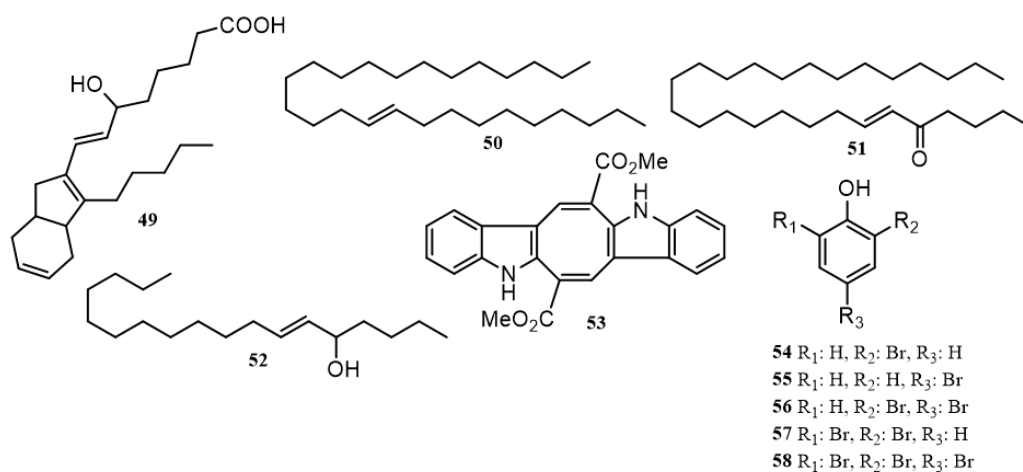

S6. Miscellaneous Compounds Isolated from Green Algae.

S7. Biological Activity Summary of Green Algae (Chlorophyta).

| Species                   | Extract/Pure             | Activity                  | Assay                      | Potency [Ref]                        |
|---------------------------|--------------------------|---------------------------|----------------------------|--------------------------------------|
| <i>C. brownii</i>         | Pure Compound:<br>7      | Antibacterial             | <i>S. aureus</i> (G-)      | >4 mm at 100 µg/disk [28]            |
|                           |                          | Antibacterial             | <i>B. subtilis</i> (G+)    | >4 mm at 100 µg/disk [28]            |
|                           |                          | Antibacterial             | <i>E. coli</i> (G-)        | >4 mm at 100 µg/disk [28]            |
|                           |                          | Antibacterial             | <i>V. anguillarum</i> (G-) | >4 mm at 100 µg/disk [28]            |
| <i>C. flexilis</i>        | Pure Compound:<br>23     | Antimicrobial             | <i>B. subtilis</i> (G+)    | >4 mm at 100 µg/disk [28]            |
|                           |                          | Antifungal                | <i>D. haloides</i>         | >4 mm at 100 µg/disk [28]            |
|                           |                          | Antifungal                | <i>Lulworthia</i> sp.      | >4 mm at 100 µg/disk [28]            |
|                           |                          | Cytotoxic                 | Fertilised sea urchin eggs | ~ [28, 188]                          |
| <i>C. trifaria</i>        | Pure Compound:<br>5<br>9 | Cytotoxic                 | Brine Shrimp Assay         | 70% mortality at 10 mg/mL, 24 h [22] |
|                           |                          | Cytotoxic                 | Brine Shrimp Assay         | 40% mortality at 10 mg/mL, 24 h [22] |
|                           | 23                       | Antimicrobial             | <i>B. subtilis</i> (G+)    | >4 mm at 100 µg/disk [28]            |
|                           |                          | Antifungal                | <i>D. haloides</i>         | >4 mm at 100 µg/disk [28]            |
|                           |                          | Antifungal                | <i>Lulworthia</i> sp.      | >4 mm at 100 µg/disk [28]            |
|                           |                          | Cytotoxic                 | Fertilised sea urchin eggs | ~ [28, 188]                          |
| <i>C. scalpelliformis</i> | Crude Extract:<br>Hexane | Antibacterial             | <i>K. pneumoniae</i> (G-)  | 6.2 mm at 25 µg/disk [189]           |
|                           |                          | Antibacterial             | <i>E. coli</i> (G-)        | 4.8 mm at 25 µg/disk [189]           |
|                           |                          | Antibacterial             | <i>S. aureus</i> (G-)      | 6.0 mm at 25 µg/disk [189]           |
|                           |                          | Antibacterial             | <i>P. aeruginosa</i> (G-)  | 1.4 mm at 25 µg/disk [189]           |
|                           | Chloroform               | Antibacterial             | <i>E. aerogenes</i> (G-)   | 3.2 mm at 25 µg/disk [189]           |
|                           |                          | Antibacterial             | <i>K. pneumoniae</i> (G-)  | 4.0 mm at 25 µg/disk [189]           |
|                           |                          | Antibacterial             | <i>E. coli</i> (G-)        | 2.6 mm at 25 µg/disk [189]           |
|                           |                          | Antibacterial             | <i>S. aureus</i> (G+)      | 3.4 mm at 25 µg/disk [189]           |
|                           |                          | Antibacterial             | <i>P.aeruginosa</i> (G-)   | 3.6 mm at 25 µg/disk [189]           |
|                           | Ethyl acetate            | Antibacterial             | <i>E. aerogenes</i> (G-)   | 2.6 mm at 25 µg/disk [189]           |
|                           |                          | Antibacterial             | <i>K. pneumoniae</i> (G-)  | 3.2 mm at 25 µg/disk [189]           |
|                           |                          | Antibacterial             | <i>E. coli</i> (G-)        | 2.2 mm at 25 µg/disk [189]           |
|                           |                          | Antibacterial             | <i>S. aureus</i> (G+)      | 3.0 mm at 25 µg/disk [189]           |
|                           |                          | Antibacterial             | <i>P.aeruginosa</i> (G-)   | 4.0 mm at 25 µg/disk [189]           |
|                           | Acetone                  | Antibacterial             | <i>B. subtilis</i> (G+)    | 5.4 mm at 25 µg/disk [189]           |
|                           |                          | Antibacterial             | <i>E. aerogenes</i> (G-)   | 14.0 mm at 25 µg/disk [189]          |
|                           |                          | Antibacterial             | <i>K. pneumoniae</i> (G-)  | 8.8 mm at 25 µg/disk [189]           |
|                           |                          | Antibacterial             | <i>E. coli</i> (G-)        | 8.0 mm at 25 µg/disk [189]           |
|                           |                          | Antibacterial             | <i>S. aureus</i> (G+)      | 2.4 mm at 25 µg/disk [189]           |
|                           |                          | Antibacterial             | <i>P.aeruginosa</i> (G-)   | 5.4 mm at 25 µg/disk [189]           |
|                           | Ethanol                  | Antibacterial             | <i>E. aerogenes</i> (G-)   | 2.6 mm at 25 µg/disk [189]           |
|                           |                          | Antibacterial             | <i>K. pneumoniae</i> (G-)  | 2.0 mm at 25 µg/disk [189]           |
|                           |                          | Antibacterial             | <i>E. coli</i> (G-)        | 2.2 mm at 25 µg/disk [189]           |
|                           |                          | Antibacterial             | <i>S. aureus</i> (G+)      | 2.2 mm at 25 µg/disk [189]           |
| Antibacterial             |                          | <i>P.aeruginosa</i> (G-)  | 2.6 mm at 25 µg/disk [189] |                                      |
| Methanol                  | Antibacterial            | <i>B. subtilis</i> (G+)   | 1.6 mm at 25 µg/disk [189] |                                      |
|                           | Antibacterial            | <i>E. aerogenes</i> (G-)  | 4.0 mm at 25 µg/disk [189] |                                      |
|                           | Antibacterial            | <i>K. pneumoniae</i> (G-) | 6.0 mm at 25 µg/disk [189] |                                      |
|                           | Antibacterial            | <i>E. coli</i> (G-)       | 4.2 mm at 25 µg/disk [189] |                                      |
|                           | Antibacterial            | <i>S. aureus</i> (G+)     | 5.2 mm at 25 µg/disk [189] |                                      |
|                           | Antibacterial            | <i>P.aeruginosa</i> (G-)  | 5.6 mm at 25 µg/disk [189] |                                      |

### S3. Biological Activity Summary of Green Algae (Chlorophyta) (continued)

|                     |                                         |                               |                                                                                                                                              |                                                               |                         |
|---------------------|-----------------------------------------|-------------------------------|----------------------------------------------------------------------------------------------------------------------------------------------|---------------------------------------------------------------|-------------------------|
| <i>C. duthieae</i>  | Crude Extract:<br>Methanol:Water<br>1:1 | Antioxidant<br>Antialzheimers | DPPH scavenging<br>AChE inhibitor                                                                                                            | 47.7% at 1 mg/mL [190]<br>IC <sub>50</sub> : 0.14 mg/mL [190] |                         |
| <i>C. fragile</i>   | Pure Compound:<br>Clerosterol (39)      | Antitumour                    | Human melanoma cells (A2058)                                                                                                                 | IC <sub>50</sub> : 150 µM [191]                               |                         |
|                     | Dimethylsulfonio<br>propionate          | Antipredation                 | Reduced grazing of <i>Strongylocentrotus droebachiensis</i>                                                                                  | ~ [192]                                                       |                         |
| Crude Extracts:     |                                         |                               |                                                                                                                                              |                                                               |                         |
| <i>U. australis</i> | Pure Compounds:                         |                               |                                                                                                                                              |                                                               |                         |
|                     | 41                                      | Antidiabetes                  |                                                                                                                                              | 3.31% at 3 µg/mL [36]                                         |                         |
|                     | 42                                      | Antidiabetes                  |                                                                                                                                              | 4.08% at 3 µg/mL [36]                                         |                         |
|                     | 45                                      | Antidiabetes                  | Recombinant aldose reductase inhibitors                                                                                                      | 2.87% at 3 µg/mL [36]                                         |                         |
|                     | 47                                      | Antidiabetes                  |                                                                                                                                              | 8.13% at 3 µg/mL [36]                                         |                         |
|                     | 46                                      | Antidiabetes                  |                                                                                                                                              | 31.28% at 3 µg/mL [36]                                        |                         |
| <i>U. compressa</i> | Crude Extracts:<br>Dichloromethane      | Antioxidant                   | DPPH scavenging                                                                                                                              | IC <sub>50</sub> : 453.3 µg/mL [194]                          |                         |
| <i>U. lactuca</i>   | Crude Extracts:                         |                               |                                                                                                                                              |                                                               |                         |
|                     | Methanol                                | Antibacterial                 | 10 <i>S. aureus</i> strains<br>USA100, USA 200, USA 300, USA 400, USA 500,<br>USA 600, COL, Newman, SH 1000, <i>S. epidermis</i> (All<br>G+) | Dependant on lunar cycle of algae<br>collection [195]         |                         |
|                     | Methanol                                | Antibacterial                 | <i>S. aureus</i> (G+)                                                                                                                        | 11 mm at 25 mg/mL [196]                                       |                         |
|                     |                                         | Antibacterial                 | <i>B. subtilis</i> (G+)                                                                                                                      | 11 mm at 25 mg/mL [196]                                       |                         |
|                     |                                         | Antibacterial                 | <i>E. coli</i> (G-)                                                                                                                          | 12 mm at 25 mg/mL [196]                                       |                         |
|                     |                                         | Antibacterial                 | <i>P. aeruginosa</i> (G-)                                                                                                                    | 14 mm at 25 mg/mL [196]                                       |                         |
|                     |                                         | Antibacterial                 | <i>B. spp</i> (G+)                                                                                                                           | 13 mm at 25 mg/mL [196]                                       |                         |
|                     |                                         | Antibacterial                 | <i>S. typhi</i> (G-)                                                                                                                         | 13 mm at 25 mg/mL [196]                                       |                         |
|                     |                                         | Antibacterial                 | <i>S. epidermis</i> (G+)                                                                                                                     | 11 mm at 25 mg/mL [196]                                       |                         |
|                     |                                         | Antibacterial                 | <i>K. spp</i> (G-)                                                                                                                           | 14 mm at 25 mg/mL [196]                                       |                         |
|                     |                                         | Aqueous                       | Antibacterial                                                                                                                                | <i>S. aureus</i> (G+)                                         | 12 mm at 25 mg/mL [196] |
|                     |                                         |                               | Antibacterial                                                                                                                                | <i>B. subtilis</i> (G+)                                       | 12 mm at 25 mg/mL [196] |
|                     | Antibacterial                           |                               | <i>E. coli</i> (G-)                                                                                                                          | 12 mm at 25 mg/mL [196]                                       |                         |
|                     | Antibacterial                           |                               | <i>P. aeruginosa</i> (G-)                                                                                                                    | ND [196]                                                      |                         |
|                     | Antibacterial                           |                               | <i>B. spp</i> (G+)                                                                                                                           | 13 mm at 25 mg/mL [196]                                       |                         |
|                     | Antibacterial                           |                               | <i>S. typhi</i> (G-)                                                                                                                         | 11 mm at 25 mg/mL [196]                                       |                         |
|                     | Antibacterial                           |                               | <i>S. epidermis</i> (G+)                                                                                                                     | 12 mm at 25 mg/mL [196]                                       |                         |
|                     | Antibacterial                           |                               | <i>K. spp</i> (G-)                                                                                                                           | 11 mm at 25 mg/mL [196]                                       |                         |
|                     | 70% Acetone                             | Antibacterial                 | <i>B. subtilis</i> (G+)                                                                                                                      | 19 mm at 100 mg/mL [197]                                      |                         |
|                     |                                         | Antibacterial                 | <i>Staph. aereus</i> (G+)                                                                                                                    | 17 mm at 100 mg/mL [197]                                      |                         |
|                     |                                         | Antibacterial                 | <i>Strept. aereus</i> (G+)                                                                                                                   | 16 mm at 100 mg/mL [197]                                      |                         |
|                     |                                         | Antibacterial                 | <i>E. coli</i> (G-)                                                                                                                          | 16 mm at 100 mg/mL [197]                                      |                         |
|                     |                                         | Antibacterial                 | <i>S. typhi</i> (G-)                                                                                                                         | 17 mm at 100 mg/mL [197]                                      |                         |
|                     |                                         | Antibacterial                 | <i>K. pneumoniae</i> (G-)                                                                                                                    | 16.5 mm at 100 mg/mL [197]                                    |                         |
|                     |                                         | Antifungal                    | <i>C. albicans</i>                                                                                                                           | 16 mm at 100 mg/mL [197]                                      |                         |
|                     | 70% Methanol                            | Antibacterial                 | <i>B. subtilis</i> (G+)                                                                                                                      | 16 mm at 100 mg/mL [197]                                      |                         |
|                     |                                         | Antibacterial                 | <i>Staph. aereus</i> (G+)                                                                                                                    | 12 mm at 100 mg/mL [197]                                      |                         |
| Antibacterial       |                                         | <i>Strept. aereus</i> (G+)    | 13 mm at 100 mg/mL [197]                                                                                                                     |                                                               |                         |
| Antibacterial       |                                         | <i>E. coli</i> (G-)           | 13 mm at 100 mg/mL [197]                                                                                                                     |                                                               |                         |
| Antibacterial       |                                         | <i>S. typhi</i> (G-)          | 13 mm at 100 mg/mL [197]                                                                                                                     |                                                               |                         |
| Antibacterial       |                                         | <i>K. pneumoniae</i> (G-)     | 16 mm at 100 mg/mL [197]                                                                                                                     |                                                               |                         |
| Antifungal          |                                         | <i>C. albicans</i>            | 15 mm at 100 mg/mL [197]                                                                                                                     |                                                               |                         |
| 70% Ethanol         | Antibacterial                           | <i>B. subtilis</i> (G+)       | 14 mm at 100 mg/mL [197]                                                                                                                     |                                                               |                         |
|                     | Antibacterial                           | <i>Staph. aereus</i> (G+)     | 12 mm at 100 mg/mL [197]                                                                                                                     |                                                               |                         |
|                     | Antibacterial                           | <i>Strept. aereus</i> (G+)    | 13 mm at 100 mg/mL [197]                                                                                                                     |                                                               |                         |
|                     | Antibacterial                           | <i>E. coli</i> (G-)           | 13 mm at 100 mg/mL [197]                                                                                                                     |                                                               |                         |
|                     | Antibacterial                           | <i>S. typhi</i> (G-)          | 13 mm at 100 mg/mL [197]                                                                                                                     |                                                               |                         |
|                     | Antibacterial                           | <i>K. pneumoniae</i> (G-)     | 14 mm at 100 mg/mL [197]                                                                                                                     |                                                               |                         |
|                     | Antifungal                              | <i>C. albicans</i>            | 14 mm at 100 mg/mL [197]                                                                                                                     |                                                               |                         |

#### S4. Biological Activity Summary of Green Algae (Chlorophyta) (continued)

|                                  |                  |                   |                                |                                          |
|----------------------------------|------------------|-------------------|--------------------------------|------------------------------------------|
| <i>U. lactuca</i>                | MeOH:DCM<br>1:1  | Antioxidant       | DPPH scavenging                | IC <sub>50</sub> : 16.5-18.7 µg/mL [198] |
|                                  |                  | Antibacterial     | <i>B. cereus</i> (G+)          | MIC 350-400 µg/mL [198]                  |
|                                  |                  | Antibacterial     | <i>B. subtilis</i> (G+)        | MIC 350-400 µg/mL [198]                  |
|                                  |                  | Antibacterial     | <i>S. aureus</i> (G+)          | MIC 350-400 µg/mL [198]                  |
|                                  |                  | Antibacterial     | <i>M. luteus</i> (G+)          | MIC 350-400 µg/mL [198]                  |
|                                  |                  | Antibacterial     | <i>S. marcescens</i> (G-)      | MIC 350-400 µg/mL [198]                  |
|                                  |                  | Antibacterial     | <i>K. pneumoniae</i> (G-)      | MIC 350-400 µg/mL [198]                  |
| <b><i>U. lactuca</i> (cont.)</b> | Pure Compounds:  |                   |                                |                                          |
|                                  | (C18 acid)       | Antioxidant       | ARE-Nrf2 antioxidant activator | EC <sub>50</sub> : 6.0 µg/mL [199]       |
|                                  | (C16 acid)       | activators        | ARE-Nrf2 antioxidant activator | EC <sub>50</sub> : 17.7 µg/mL [199]      |
|                                  |                  | Antibacterial     | <i>S. lactus</i> (G+)          | 25 mm at 200 µg/disk [38]                |
|                                  |                  | Antibacterial     | <i>B. subtilis</i> (G+)        | 15 mm at 200 µg/disk [38]                |
|                                  |                  | Antibacterial     | <i>P. putidu</i> (G-)          | 12 mm at 200 µg/disk [38]                |
|                                  | 3-O-β-D          | Antibacterial     | <i>E. coli</i> (G-)            | 14 mm at 200 µg/disk [38]                |
|                                  | glucopyranosyl-  | Antifungal        | <i>F. oxysporium</i>           | 14 mm at 100 µg/disk [38]                |
|                                  | clerosterol (47) | Antifungal        | <i>Rhizoctonia solani</i>      | 7 mm at 100 µg/disk [38]                 |
|                                  |                  | Antifungal        | <i>P. digitatum</i>            | 10 mm at 100 µg/disk [38]                |
|                                  |                  | Antifungal        | <i>S. cerevisiae</i>           | 16 mm at 100 µg/disk [38]                |
|                                  |                  | Antifungal        | <i>K. lactis</i>               | 11 mm at 100 µg/disk [38]                |
|                                  |                  | Anti-inflammatory | Mouse Ear Oedema               | 62.25% at 1000 µg/ear [38]               |



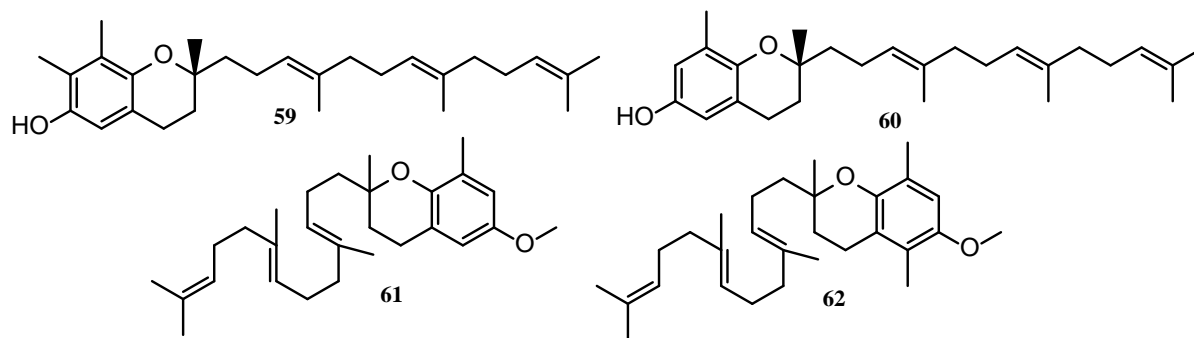

S8. Tocotrienols Isolated from Brown Algae.

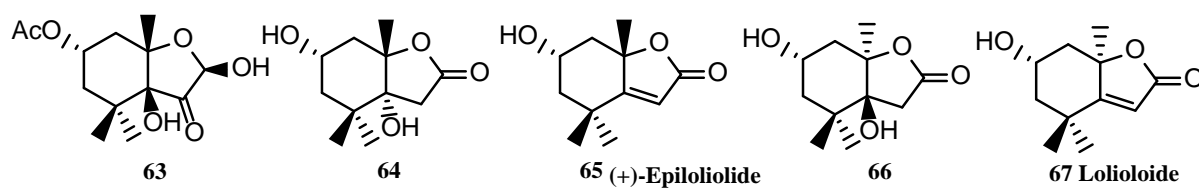

S9. Monoterpenes Isolated from Brown Algae.

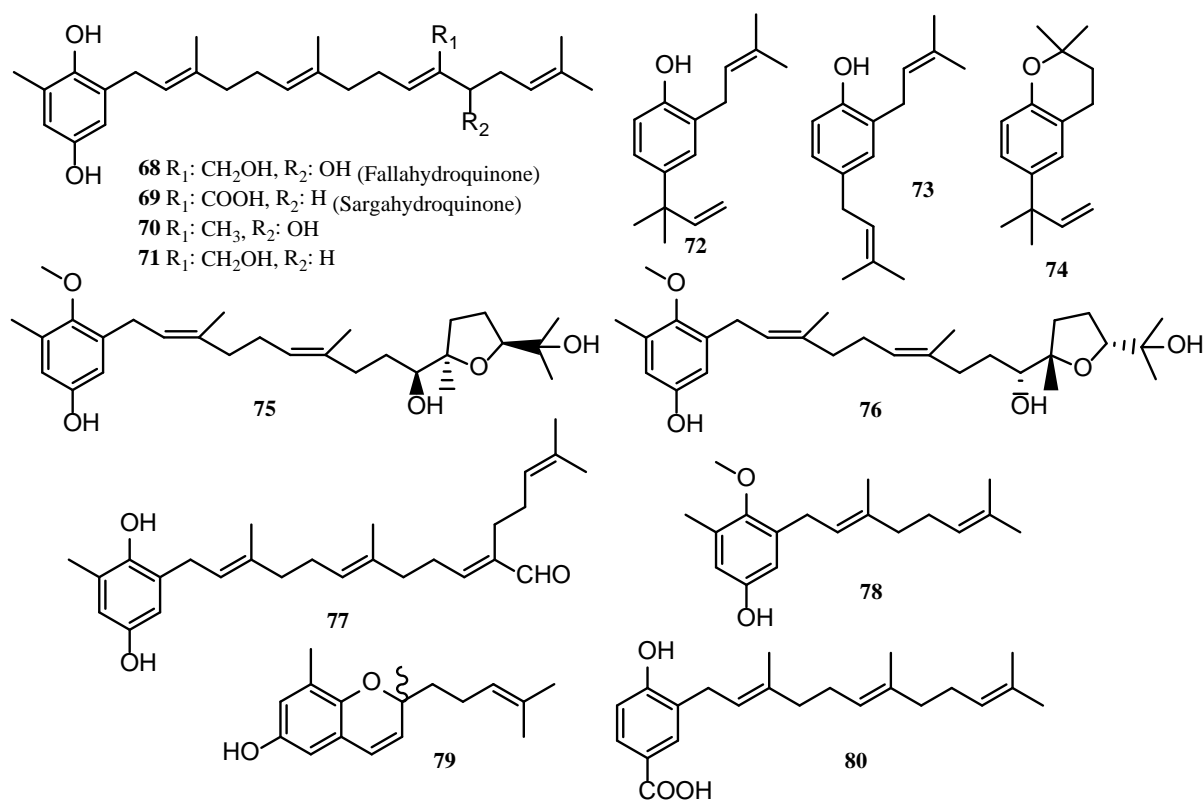

S10. Prenylated Phenols Isolated from Brown Algae.

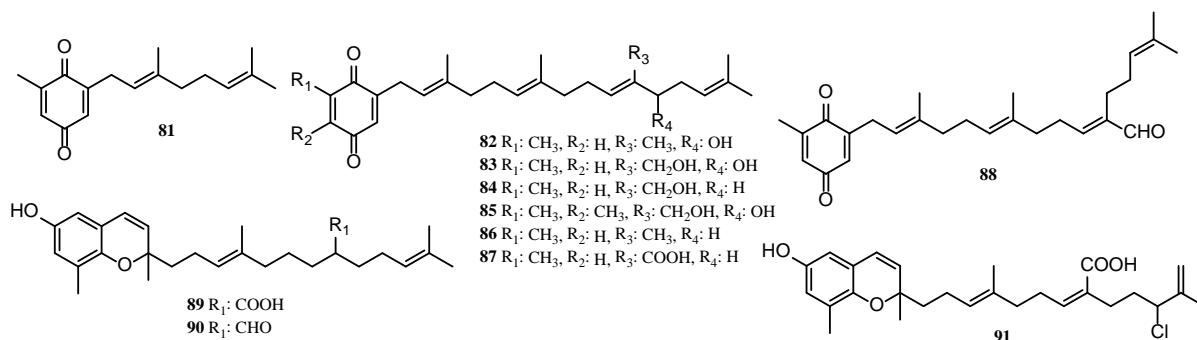

**S11. Meroditerpenoids Isolated from Brown Algae.**

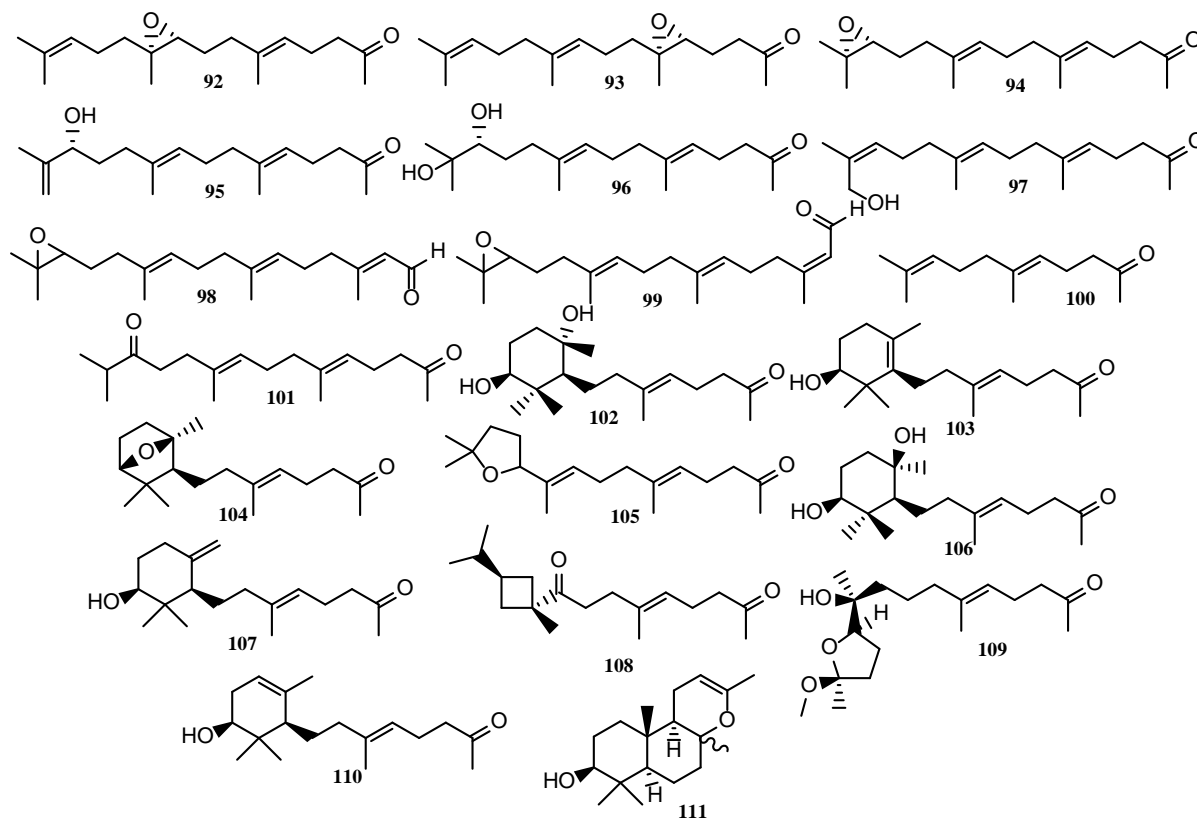

**S12. Prenylated Acetones and Aldehydes Isolated from Brown Algae.**

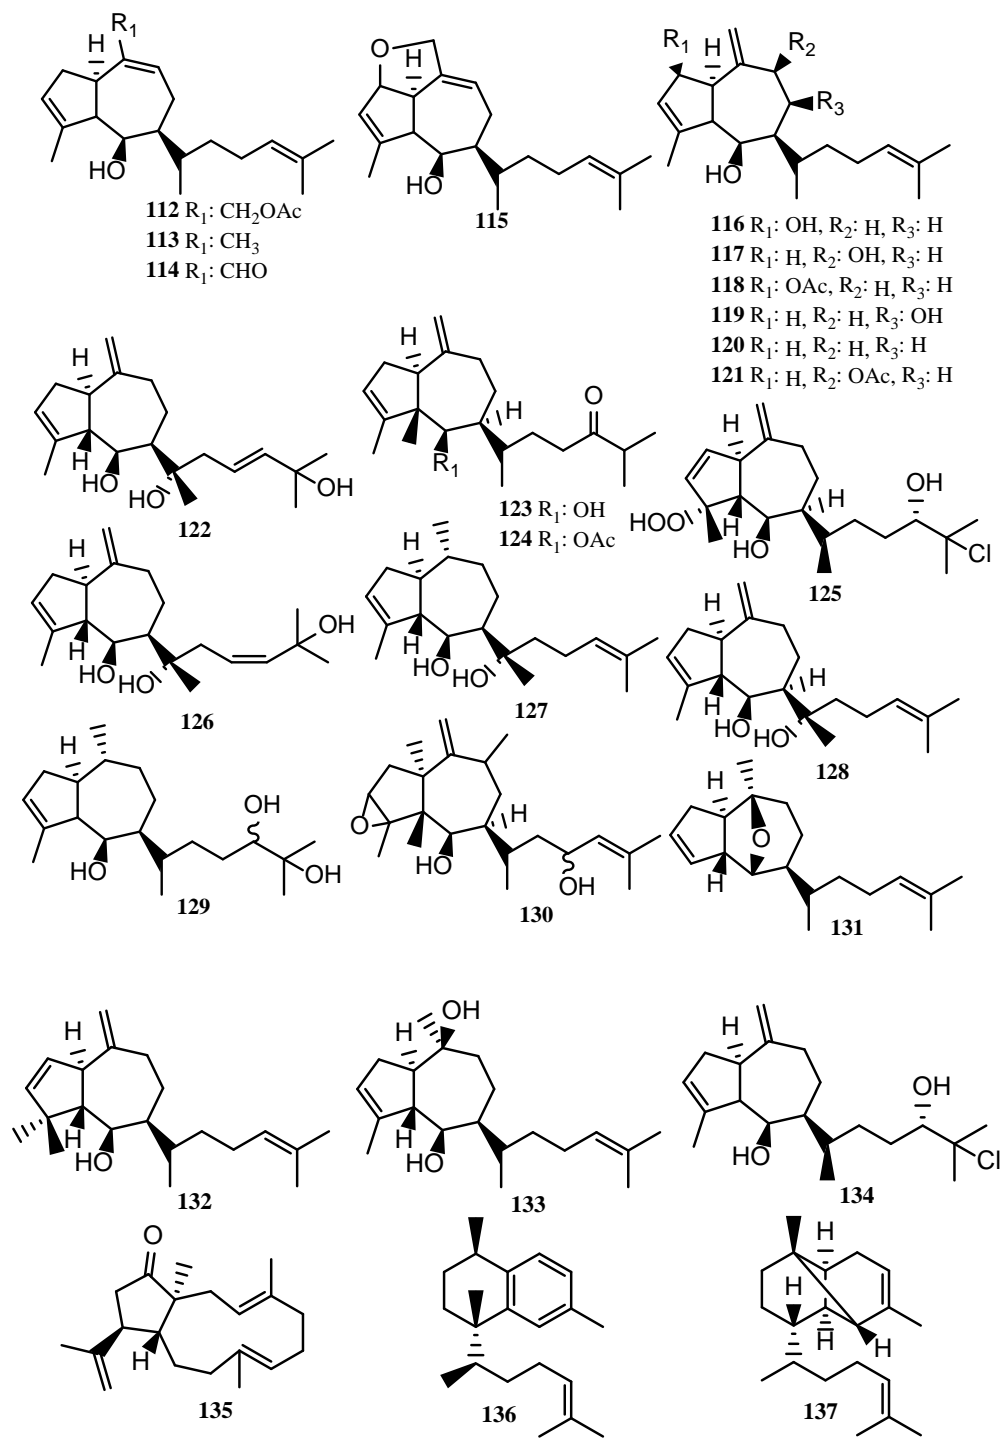

S13. Diterpenoids Isolated from Brown Algae.

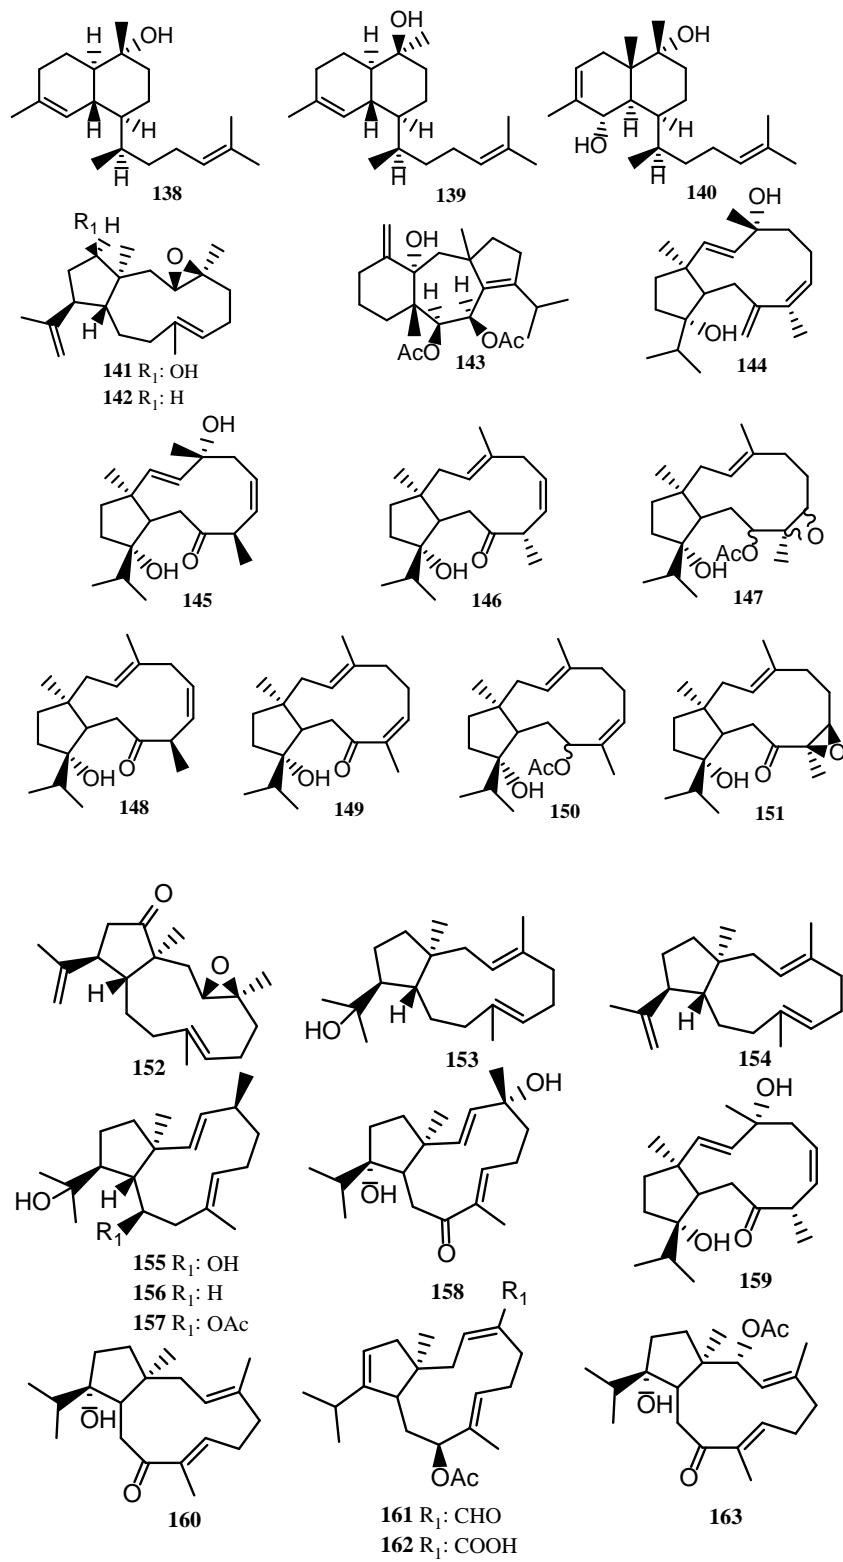

S14. Diterpenoids Isolated from Brown Algae (continued).

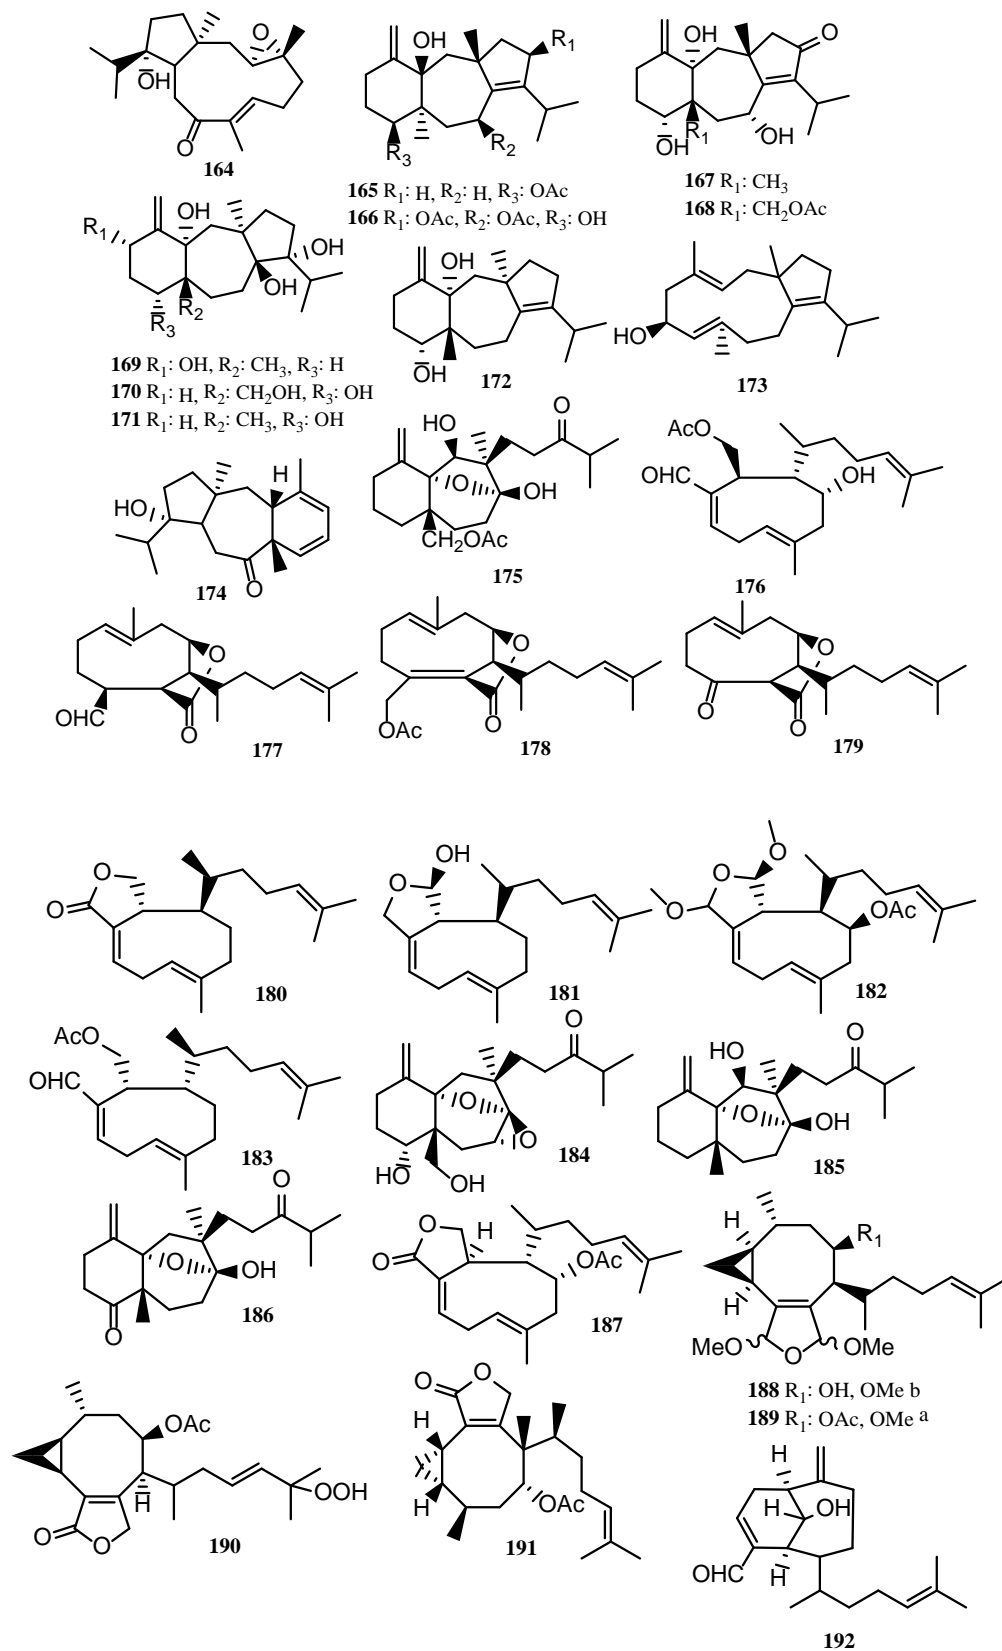

S15. Diterpenoids Isolated from Brown Algae (continued).

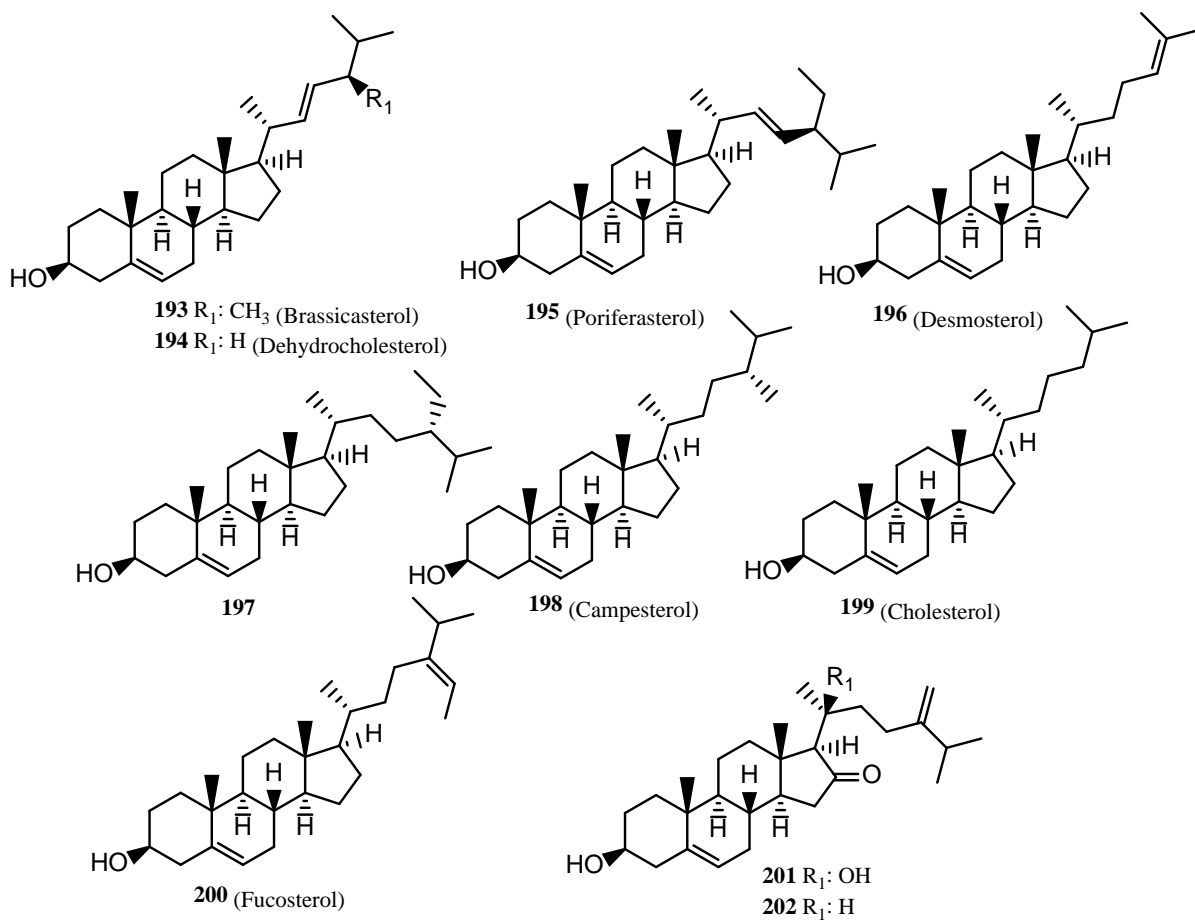

S16. Steroids/sterols Isolated from Brown Algae.

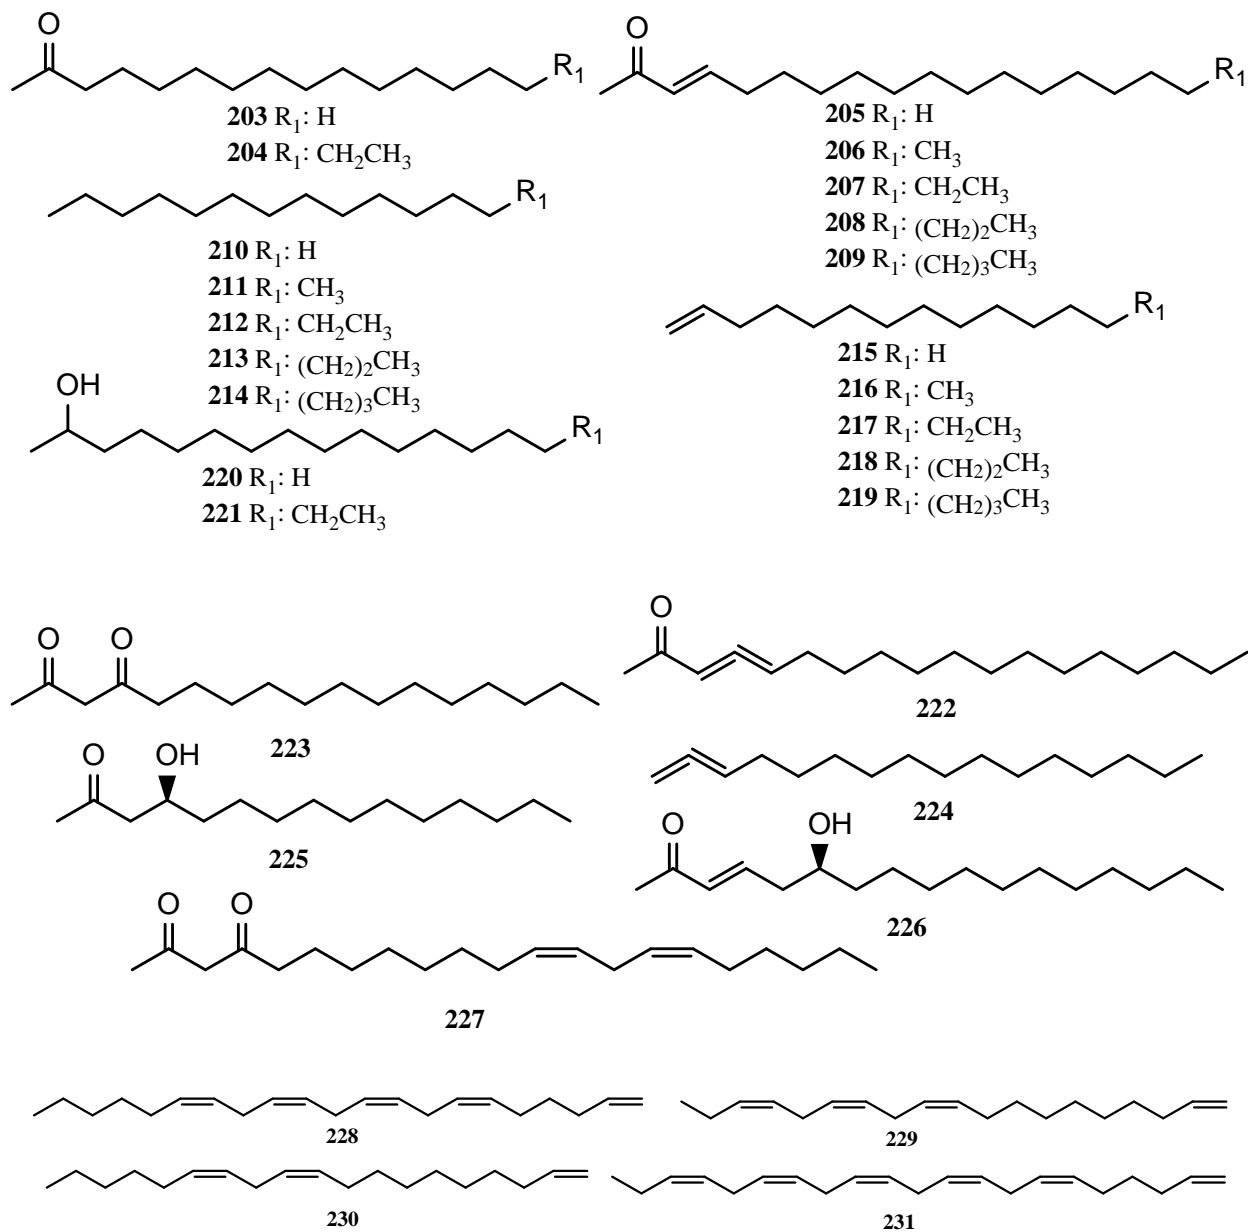

S17. Lipids and Polyenes Isolated from Brown Algae.

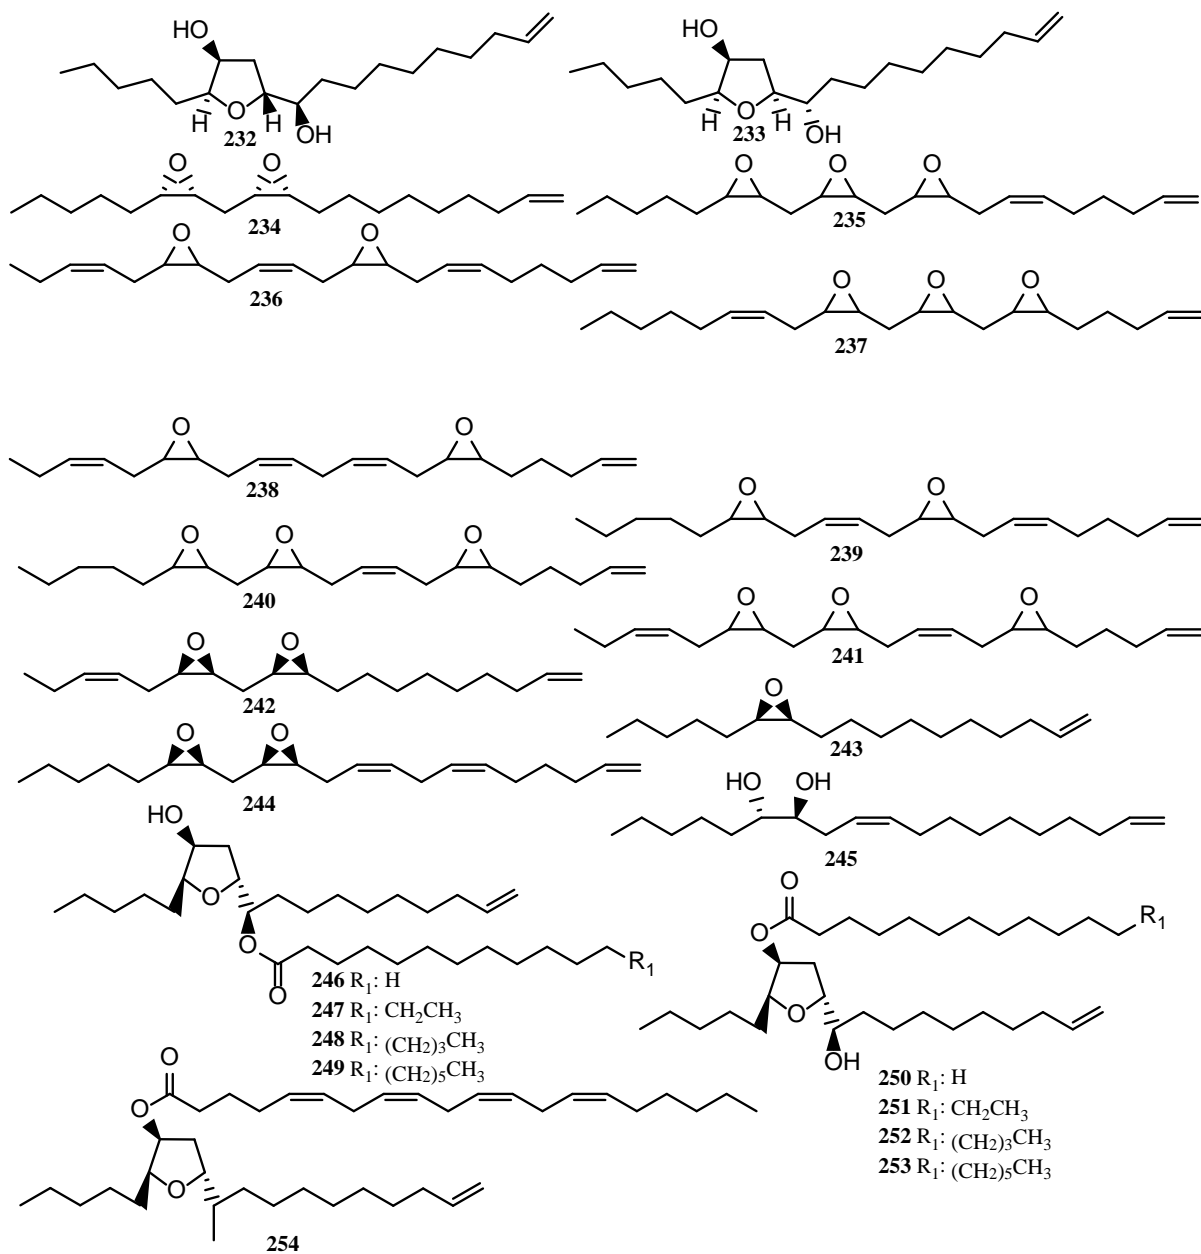

S18. Oxylipids and Epoxylipids Isolated from Brown Algae.



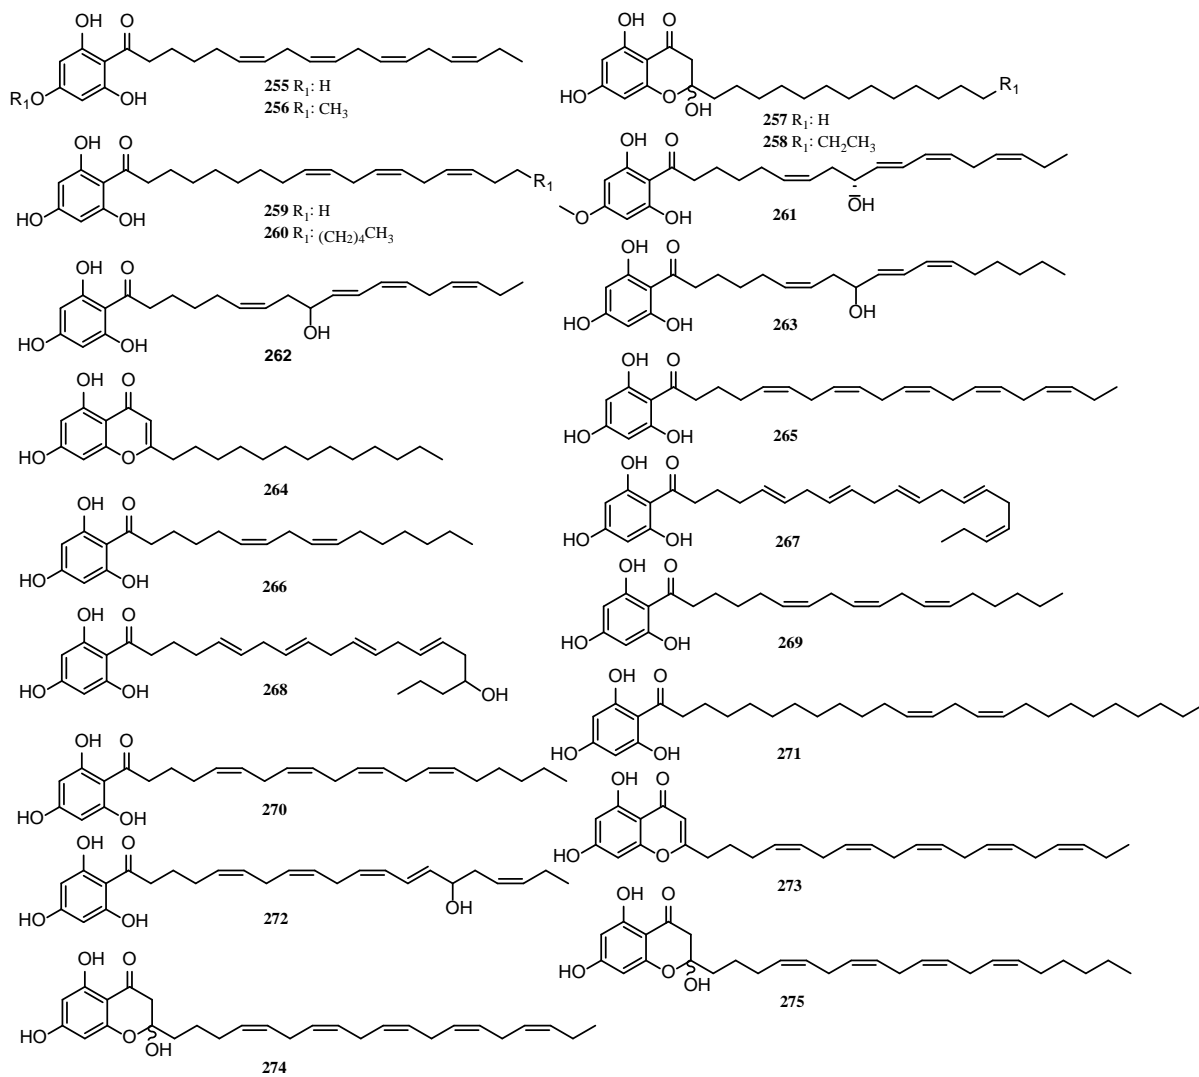

**S19.** Phloroglucinols Isolated from Brown Algae.

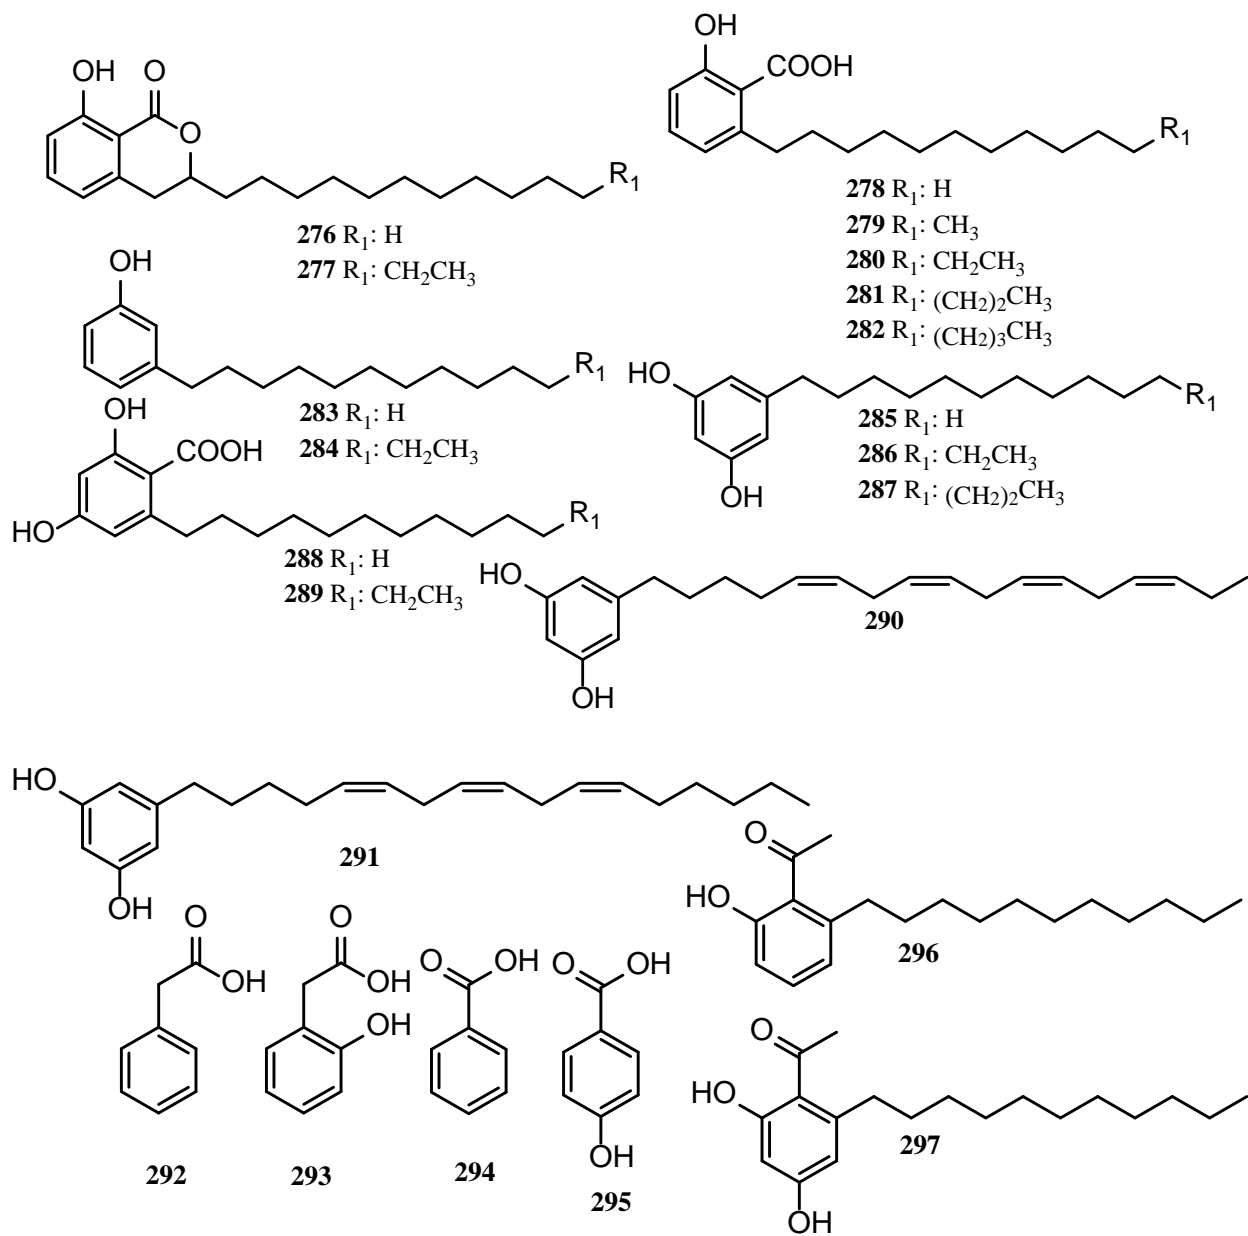

S20. Phenols/phenolic acids/resorcinols Isolated from Brown Algae.

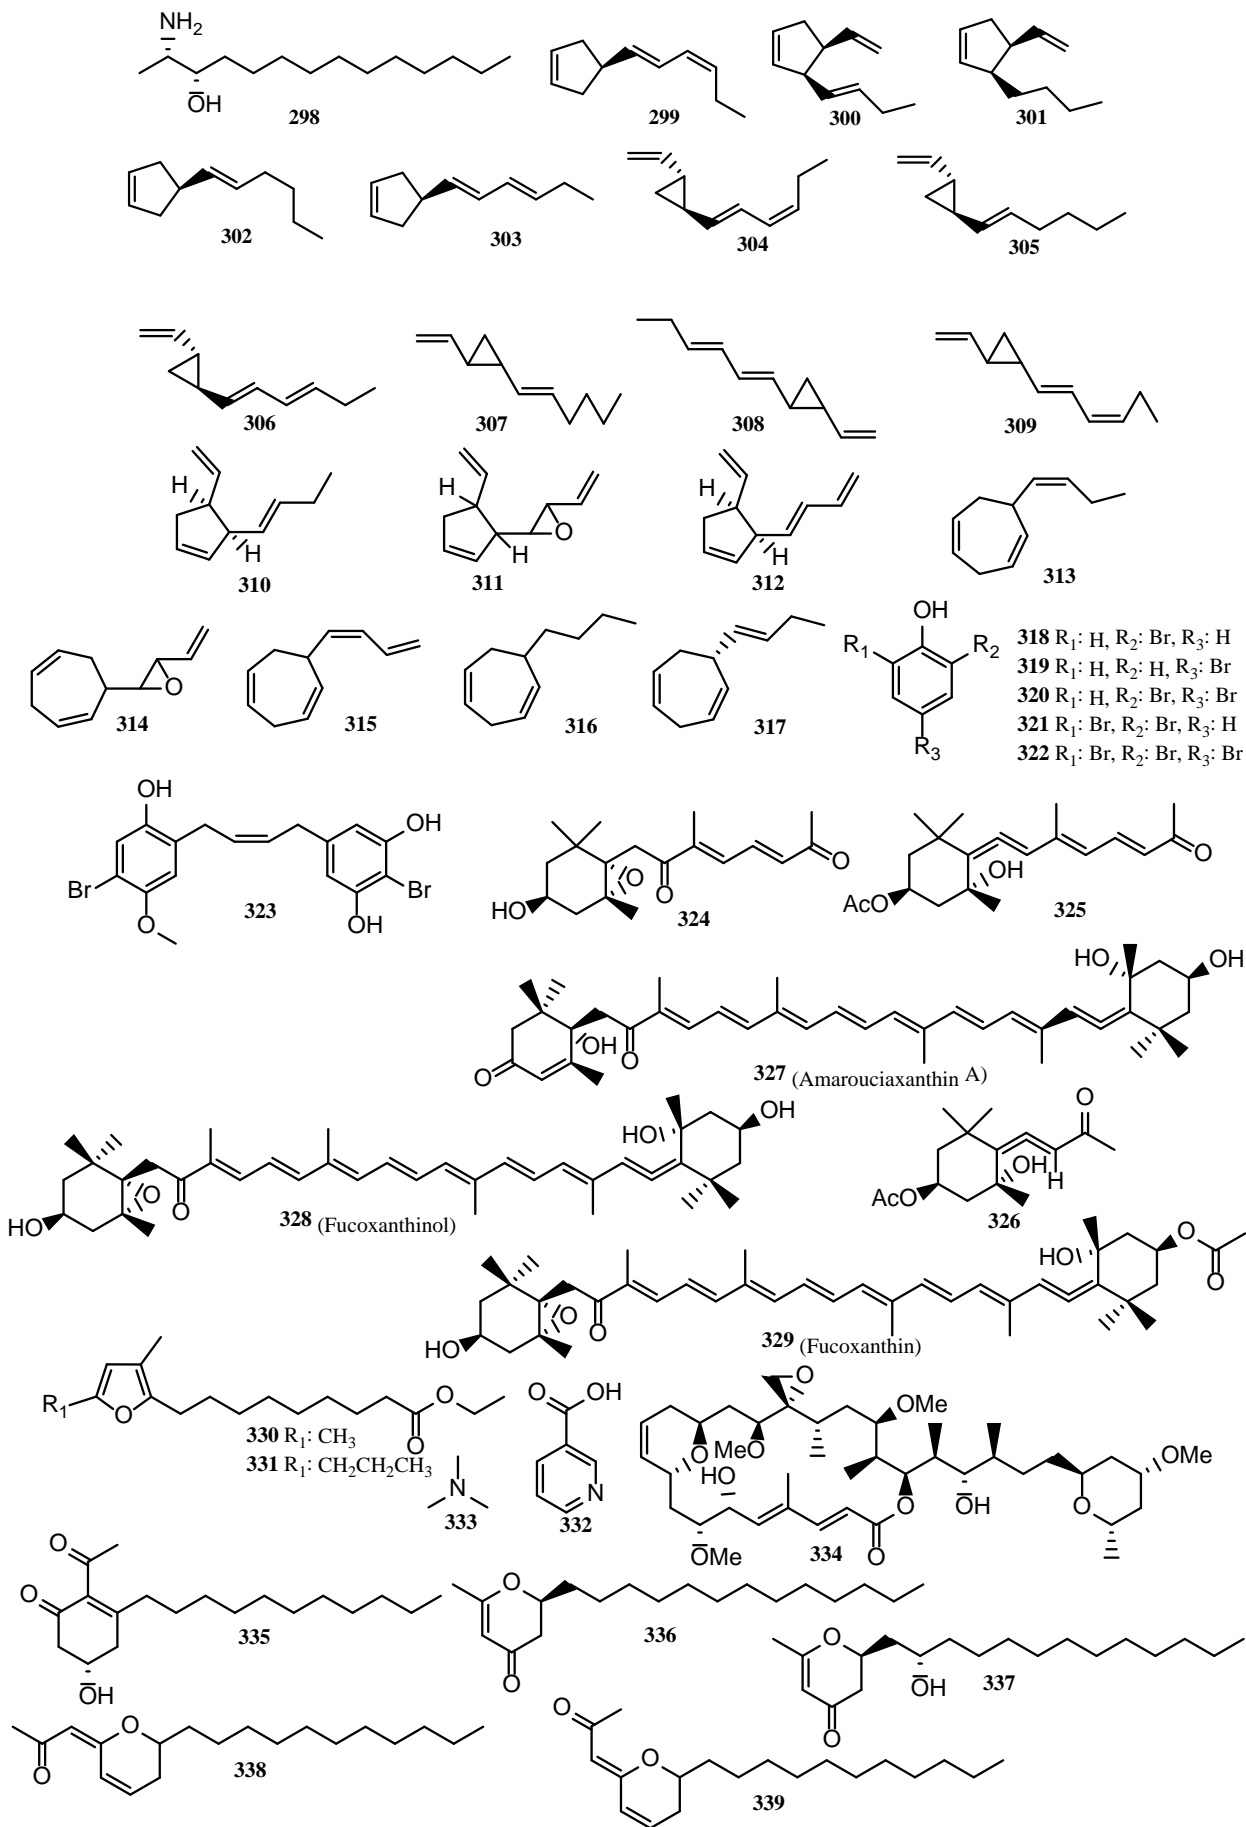

S21. Miscellaneous Compounds Isolated from Brown Algae.

S22. Biological Activity Summary of Brown Algae (Ochrophyta).

| Species                            | Extract/Pure Compound                  | Activity                 | Assay                                                                      | Potency [Ref]                                    |
|------------------------------------|----------------------------------------|--------------------------|----------------------------------------------------------------------------|--------------------------------------------------|
| <i>C. spongiosum</i>               | Crude Extract:<br>Ethanol              | Antioxidant              | Hydroxyl Scavenging                                                        | EC <sub>25</sub> : 0.54 mg/mL [175]              |
|                                    |                                        | Antioxidant              | Nitric Oxide Scavenging                                                    | EC <sub>25</sub> : 3.19 mg/mL [175]              |
| <i>C. sinuosa</i>                  | Pure Compounds:<br><br>Colpol (323)    | Antitumour               | P388                                                                       | IC <sub>50</sub> : 10 µg/mL [105]                |
|                                    |                                        | Antitumour               | A549                                                                       | IC <sub>50</sub> : 10 µg/mL [105]                |
|                                    |                                        | Antitumour               | HT-29                                                                      | IC <sub>50</sub> : 10 µg/mL [105]                |
|                                    |                                        | Antitumour               | CV-1                                                                       | IC <sub>50</sub> : 10 µg/mL [105]                |
|                                    | Crude Extracts:<br><br>Methanol        | Antibacterial            | <i>S. aureus</i> (G+)                                                      | 9 mm at 1.5 mg/disk [200]                        |
|                                    |                                        | Antibacterial            | MRSA (G+)                                                                  | 8mm at 1.5 mg/disk [200]                         |
|                                    |                                        | Antibacterial            | <i>P. vulgaris</i> (G-)                                                    | 6.5 mm at 1.5 mg/disk [200]                      |
|                                    | Dichloromethane                        | Antibacterial            | <i>S. aureus</i> (G+)                                                      | 7.5 mm at 1.5 mg/disk [200]                      |
|                                    |                                        | Antibacterial            | MRSA (G+)                                                                  | 7.5 mm at 1.5 mg/disk [200]                      |
|                                    |                                        | Antibacterial            | <i>P. vulgaris</i> (G+)                                                    | 8.5 mm at 1.5 mg/disk [200]                      |
|                                    |                                        | Antibacterial            | <i>B. subtilis</i> (G+)                                                    | 6.5 mm at 1.5 mg/disk [200]                      |
|                                    | Hexane                                 | Antibacterial            | <i>P. vulgaris</i> (G-)                                                    | 6.5 mm at 1.5 mg/disk [200]                      |
|                                    |                                        | Antibacterial            | <i>S. aureus</i> (G+)                                                      | 7 mm at 1.5 mg/disk [200]                        |
|                                    | MeOH:DCM<br>1:1                        | Antitumour               | P388                                                                       | IC <sub>50</sub> : 20 µg/mL [105]                |
|                                    |                                        | Antitumour               | A549                                                                       | IC <sub>50</sub> : 20 µg/mL [105]                |
|                                    |                                        | Antitumour               | HT-29                                                                      | IC <sub>50</sub> : 20 µg/mL [105]                |
|                                    |                                        | Antitumour               | CV-1                                                                       | IC <sub>50</sub> : 20 µg/mL [105]                |
| PBS<br>(Phosphate Buffered Saline) | Antitumour                             | L1210                    | 0.1-0.3 (Ratio of viable Leukemia Cells in test compared to control) [201] |                                                  |
|                                    | Fucoxanthin Extract                    | Antitumour               | Breast Cancer (MDA-MB-231)                                                 | varying [202]                                    |
| <i>C. moniliformis</i>             | Mixture:<br>(107 + 110)<br>(107 + 110) | Antitumour               | P388                                                                       | IC <sub>50</sub> : 45 µM at 1 mg/mL [69]         |
|                                    |                                        | Antifungal               | <i>T. mentagrophytes</i>                                                   | 4 mm at 1 mg/mL [69]                             |
|                                    | Crude Extract:<br>MeOH:DCM<br>3:1      | Antitumour               | P388                                                                       | IC <sub>50</sub> : 45 ng/mL [69]                 |
| <i>C. monilifera</i>               | Pure Compounds:<br>(263)<br>(266)      | Antibacterial            | <i>S. pyogenes</i> (G+)                                                    | 1 mm at 20 µg/disk [54]                          |
|                                    |                                        | Antibacterial            | <i>S. pyogenes</i> (G+)                                                    | 1 mm at 20 µg/disk [54]                          |
|                                    | δ-tocotrienol (60)                     | Anticancer               | Pancreatic ductal cancer                                                   | significant [203]                                |
|                                    |                                        | Anticancer               | Lung cancer                                                                | Dose + time dependant [204]                      |
|                                    | γ-tocotrienol (59)                     | Anticancer               | Colon cancer (SW620 + HCT-8)                                               | Dose dependant [205]                             |
|                                    |                                        | Anticancer               | 3T3-L1 cells                                                               | Dose + time dependant [206]                      |
|                                    | Crude Extracts:<br>Ethanol             | Antioxidant              | DPPH scavenging                                                            | ~ (2018)[207]                                    |
| Dichloromethane                    | Antibacterial                          | <i>S. aureus</i> (G+)    | 1 mm at 20 µg/disk [54]                                                    |                                                  |
|                                    | Antibacterial                          | MRSA (G+)                | 2 mm at 20 µg/disk [54]                                                    |                                                  |
|                                    | Antibacterial                          | <i>S. pyogenes</i> (G+)  | 6 mm at 20 µg/disk [54]                                                    |                                                  |
| <i>C. platylobium</i>              | Pure Compounds:<br>δ-tocotrienol (60)  | Anticancer<br>Anticancer | Pancreatic ductal cancer<br>Lung cancer                                    | significant [203]<br>Dose + time dependant [204] |
| <i>C. retroflexa</i>               | Crude Extracts:<br><br>Dichloromethane | Antibacterial            | <i>S. aureus</i> (G+)                                                      | 2 mm at 20 µg/disk [89]                          |
|                                    |                                        | Antibacterial            | MRSA (G+)                                                                  | 3 mm at 20 µg/disk [89]                          |
|                                    |                                        | Antibacterial            | <i>P. aeruginosa</i> (G-)                                                  | 4 mm at 20 µg/disk [89]                          |
|                                    | Methanol                               | Antibacterial            | <i>S. aureus</i> (G+)                                                      | 1 mm at 20 µg/disk [89]                          |
|                                    |                                        | Antibacterial            | MRSA (G+)                                                                  | 4 mm at 20 µg/disk [89]                          |
|                                    |                                        | Antibacterial            | <i>P. aeruginosa</i> (G-)                                                  | 6 mm at 20 µg/disk [89]                          |
| <i>C. retorta</i>                  | Pure Compounds:<br>δ-tocotrienol (60)  | Anticancer<br>Anticancer | Pancreatic ductal cancer<br>Lung cancer                                    | significant [203]<br>Dose + time dependant [204] |

**S22. Biological Activity Summary of Brown Algae (Ochrophyta) (continued)**

|                       |                                                                                                                         |                                                                                                                                                                                                                                                                                                                                                           |                                                                                                                                                                                                                                                                                                                                                                                                                                                                                                                                                                                                                                                            |                                                                                                                                                                                                                                                                                                                                                                                                                                                                                                                                                                                                                                                                                                                                                                                                                                                                                                                                                                                                                                                                                                                                                         |
|-----------------------|-------------------------------------------------------------------------------------------------------------------------|-----------------------------------------------------------------------------------------------------------------------------------------------------------------------------------------------------------------------------------------------------------------------------------------------------------------------------------------------------------|------------------------------------------------------------------------------------------------------------------------------------------------------------------------------------------------------------------------------------------------------------------------------------------------------------------------------------------------------------------------------------------------------------------------------------------------------------------------------------------------------------------------------------------------------------------------------------------------------------------------------------------------------------|---------------------------------------------------------------------------------------------------------------------------------------------------------------------------------------------------------------------------------------------------------------------------------------------------------------------------------------------------------------------------------------------------------------------------------------------------------------------------------------------------------------------------------------------------------------------------------------------------------------------------------------------------------------------------------------------------------------------------------------------------------------------------------------------------------------------------------------------------------------------------------------------------------------------------------------------------------------------------------------------------------------------------------------------------------------------------------------------------------------------------------------------------------|
| <i>C. retorta</i>     | (228)<br>(231)                                                                                                          | Lipoxygenase inhibition                                                                                                                                                                                                                                                                                                                                   | Lipoxygenase                                                                                                                                                                                                                                                                                                                                                                                                                                                                                                                                                                                                                                               | IC <sub>50</sub> : 40 µM [81]<br>IC <sub>50</sub> : 5.0 µM [81]                                                                                                                                                                                                                                                                                                                                                                                                                                                                                                                                                                                                                                                                                                                                                                                                                                                                                                                                                                                                                                                                                         |
| <i>C. siliquosa</i>   | Pure Compounds:<br>δ-tocotrienol (60)                                                                                   | Anticancer<br>Anticancer                                                                                                                                                                                                                                                                                                                                  | Pancreatic ductal cancer<br>Lung cancer                                                                                                                                                                                                                                                                                                                                                                                                                                                                                                                                                                                                                    | significant [203]<br>Dose + time dependant [204]                                                                                                                                                                                                                                                                                                                                                                                                                                                                                                                                                                                                                                                                                                                                                                                                                                                                                                                                                                                                                                                                                                        |
| <i>C. subfarinata</i> | Pure Compounds:<br>(255)<br><br>(256)<br><br>(259)<br>δ-tocotrienol (60)<br><br>Crude Extracts:<br><br>MeOH:DCM<br>3:1  | Antibacterial<br><br>Antibacterial<br>Antibacterial<br><br>Antibacterial<br>Anticancer<br>Anticancer<br><br>Antibacterial<br>Antifungal<br>Antifungal                                                                                                                                                                                                     | <i>S. pyogenes</i> (G+)<br><br><i>S. aureus</i> (G+)<br><i>P. aeruginosa</i> (G-)<br><br><i>S. pyogenes</i> (G+)<br>Pancreatic ductal cancer<br>Lung cancer<br><br><i>P. aeruginosa</i> (G-)<br><i>C. albicans</i> 14053<br><i>T. mentagrophytes</i>                                                                                                                                                                                                                                                                                                                                                                                                       | 1 mm at 20 µg/disk [54]<br><br>1 mm at 20 µg/disk [54]<br>1 mm at 20 µg/disk [54]<br><br>1 mm at 20 µg/disk [54]<br>significant [203]<br>Dose + time dependant [204]<br><br>1 mm at 20 µg/disk [89]<br>3 mm at 20 µg/disk [89]<br>3 mm at 20 µg/disk [54]                                                                                                                                                                                                                                                                                                                                                                                                                                                                                                                                                                                                                                                                                                                                                                                                                                                                                               |
| <i>C. torulosa</i>    | Pure Compounds:<br>(228)<br>(231)<br><br>(286)                                                                          | Lipoxygenase inhibition<br><br>Antitumour<br>Antitumour<br>Antitumour                                                                                                                                                                                                                                                                                     | Lipoxygenase<br><br>SMMC7721<br>K562<br>HeLa                                                                                                                                                                                                                                                                                                                                                                                                                                                                                                                                                                                                               | IC <sub>50</sub> : 40 µM [81]<br>IC <sub>50</sub> : 5.0 µM [81]<br><br>IC <sub>50</sub> : 31.45 µg/mL [96]<br>IC <sub>50</sub> : 35.27 µg/mL [96]<br>IC <sub>50</sub> : 24.28 µg/mL [96]                                                                                                                                                                                                                                                                                                                                                                                                                                                                                                                                                                                                                                                                                                                                                                                                                                                                                                                                                                |
| <i>L. variegata</i>   | Pure Compounds:<br><br>(227)<br><br>(296)<br><br>(297)<br><br>(334)<br><br>(335)<br><br>(337)<br><br>(338)<br><br>(339) | Antibacterial<br>Antibacterial<br>Antibacterial<br><br>Antibacterial<br>Antibacterial<br>Antibacterial<br><br>Antifungal<br>Antifungal<br>Antifungal<br>Antifungal<br><br>Antitumour<br><br>Antibacterial<br>Antibacterial<br>Antibacterial<br><br>Antibacterial<br>Antibacterial<br>Antibacterial<br><br>Antibacterial<br>Antibacterial<br>Antibacterial | <i>E. faecalis</i> (G+)<br><i>E. coli</i> (G-)<br><i>S. aureus</i> (G+)<br><br><i>E. faecalis</i> (G+)<br><i>E. coli</i> (G-)<br><i>S. aureus</i> (G+)<br><br><i>E. faecalis</i> (G+)<br><i>E. coli</i> (G-)<br><i>S. aureus</i> (G+)<br><br><i>D. salina</i><br><i>L. thalassiae</i><br><i>C. albicans</i><br><i>C. albicans</i> (amphotericin-resistant strain)<br><br>Human colon tumour cell line HCT-116<br><br><i>E. faecalis</i> (G+)<br><i>E. coli</i> (G-)<br><i>S. aureus</i> (G+)<br><br><i>E. faecalis</i> (G+)<br><i>E. coli</i> (G-)<br><i>S. aureus</i> (G+)<br><br><i>E. faecalis</i> (G+)<br><i>E. coli</i> (G-)<br><i>S. aureus</i> (G+) | -10 % vs ciprofloxacin at 100 µg/mL [78]<br>-2.4 % vs ciprofloxacin at 100 µg/mL [78]<br>-17 % vs ciprofloxacin at 100 µg/mL [78]<br><br>-1 % vs ciprofloxacin at 100 µg/mL [78]<br>-3.3 % vs ciprofloxacin at 100 µg/mL [78]<br>65 % vs ciprofloxacin at 100 µg/mL [78]<br><br>-9.8 % vs ciprofloxacin at 100 µg/mL [78]<br>-1.0 % vs ciprofloxacin at 100 µg/mL [78]<br>17 % vs ciprofloxacin at 100 µg/mL [78]<br><br>IC <sub>50</sub> : 0.034 µg/mL<br>IC <sub>50</sub> : 0.135 µg/mL<br>IC <sub>50</sub> : 1.3 µg/mL<br>IC <sub>50</sub> : 0.5 µg/mL<br><br>IC <sub>50</sub> : 0.03 µg/mL<br><br>23 % vs ciprofloxacin at 100 µg/mL [78]<br>29 % vs ciprofloxacin at 100 µg/mL [78]<br>100 % vs ciprofloxacin at 100 µg/mL [78]<br><br>23 % vs ciprofloxacin at 100 µg/mL [78]<br>27 % vs ciprofloxacin at 100 µg/mL [78]<br>-8.5 % vs ciprofloxacin at 100 µg/mL [78]<br><br>21 % vs ciprofloxacin at 100 µg/mL [78]<br>15 % vs ciprofloxacin at 100 µg/mL [78]<br>-95 % vs ciprofloxacin at 100 µg/mL [78]<br><br>19 % vs ciprofloxacin at 100 µg/mL [78]<br>25 % vs ciprofloxacin at 100 µg/mL [78]<br>-57 % vs ciprofloxacin at 100 µg/mL [78] |

**S22. Biological Activity Summary of Brown Algae (Ochrophyta) (continued)**

|                    |                                                  |                                           |                                                                                   |                                                                                                                                                                   |                                            |
|--------------------|--------------------------------------------------|-------------------------------------------|-----------------------------------------------------------------------------------|-------------------------------------------------------------------------------------------------------------------------------------------------------------------|--------------------------------------------|
| <i>N. anomala</i>  | Pure Compounds:<br>(228)<br>(231)                | Lipoxygenase inhibition                   | Lipoxygenase                                                                      | IC <sub>50</sub> : 40 µM [81]<br>IC <sub>50</sub> : 5.0 µM [81]                                                                                                   |                                            |
|                    | (232)<br>(233)                                   | Nematocide<br>Nematocide                  | <i>T. colubriformis</i> and <i>H. contortus</i>                                   | Significant [82]<br>Significant [82]                                                                                                                              |                                            |
|                    | <i>P. caudata</i>                                | Pure Compounds:<br>(72)                   | Antifungal<br>Antibacterial                                                       | <i>Cr. neoformans</i> and <i>C. albicans</i><br><i>B. subtilis</i>                                                                                                | MIC: 3.1 µg/mL [62]<br>MIC: 6.2 µg/mL [62] |
|                    |                                                  | <i>S. linearfolium</i>                    | Pure Compound:<br>Fucosterol (200)                                                | Antiplasmodial<br><i>P. falciparum</i> (Malaria)                                                                                                                  | IC <sub>50</sub> : 7.48 µg/mL [76]         |
| <i>S. vestitum</i> | Crude Extract:                                   |                                           |                                                                                   |                                                                                                                                                                   |                                            |
|                    | Ethanol                                          | Antioxidant<br>Antioxidant<br>Antioxidant | ABTS<br>DPPH<br>FRAP                                                              | 183.38 mg TE g <sup>-1</sup> extract 1.0 mg/mL [73]<br>209.50 mg TE g <sup>-1</sup> extract 1.0 mg/mL [73]<br>283.71 mg TE g <sup>-1</sup> extract 1.0 mg/mL [73] |                                            |
|                    | MeOH:DCM<br>3:1                                  | Antibacterial<br>Antifungal<br>Antifungal | <i>P. aeruginosa</i> (G-)<br><i>C. albicans</i> 14053<br><i>T. mentagrophytes</i> | 3 mm at 20 µg/disk [89]<br>3 mm at 20 µg/disk [89]<br>2 mm at 20 µg/disk [89]                                                                                     |                                            |
|                    | <i>S. lomentaria</i>                             | Crude Extract:                            |                                                                                   |                                                                                                                                                                   |                                            |
| Methanol           |                                                  | Antibacterial                             | <i>B. subtilis</i> (G+)                                                           | 7.5 mm at 1.5 mg/disk [200]                                                                                                                                       |                                            |
|                    |                                                  | Antibacterial                             | <i>S. aureus</i> (G+)                                                             | 7.5 mm at 1.5 mg/disk [200]                                                                                                                                       |                                            |
|                    |                                                  | Antibacterial                             | MRSA (G+)                                                                         | 7 mm at 1.5 mg/disk [200]                                                                                                                                         |                                            |
| Dichloromethane    |                                                  | Antibacterial                             | <i>B. subtilis</i> (G+)                                                           | 8.5 mm at 1.5 mg/disk [200]                                                                                                                                       |                                            |
|                    |                                                  | Antibacterial                             | <i>S. aureus</i> (G+)                                                             | 8.5 mm at 1.5 mg/disk [200]                                                                                                                                       |                                            |
|                    |                                                  | Antibacterial                             | MRSA (G+)                                                                         | 7.5 mm at 1.5 mg/disk [200]                                                                                                                                       |                                            |
|                    |                                                  | Antibacterial                             | <i>E. aerogenes</i> (G-)                                                          | 6.5 mm at 1.5 mg/disk [200]                                                                                                                                       |                                            |
|                    |                                                  | Antibacterial                             | <i>E. coli</i> (G-)                                                               | 9 mm at 1.5 mg/disk [200]                                                                                                                                         |                                            |
|                    |                                                  | Antibacterial                             | <i>E. coli</i> hemorrhagic (G-)                                                   | 9.5 mm at 1.5 mg/disk [200]                                                                                                                                       |                                            |
|                    |                                                  | Antibacterial                             | <i>P. vulgaris</i> (G-)                                                           | 7.5 mm at 1.5 mg/disk [200]                                                                                                                                       |                                            |
|                    |                                                  | Antibacterial                             | <i>S. typhimurium</i> (G-)                                                        | 6.5 mm at 1.5 mg/disk [200]                                                                                                                                       |                                            |
|                    |                                                  | Antifungal                                | <i>C. albicans</i>                                                                | 6.5 mm at 1.5 mg/disk [200]                                                                                                                                       |                                            |
|                    |                                                  | Hexane                                    | Antibacterial                                                                     | <i>B. subtilis</i> (G+)                                                                                                                                           | 7.5 mm at 1.5 mg/disk [200]                |
| Antibacterial      |                                                  |                                           | <i>S. aureus</i> (G+)                                                             | 8 mm at 1.5 mg/disk [200]                                                                                                                                         |                                            |
| Antibacterial      |                                                  |                                           | MRSA (G+)                                                                         | 11 mm at 1.5 mg/disk [200]                                                                                                                                        |                                            |
| Antibacterial      | <i>E. aerogenes</i> (G-)                         |                                           | 7 mm at 1.5 mg/disk [200]                                                         |                                                                                                                                                                   |                                            |
| Antibacterial      | <i>E. coli</i> (G-)                              |                                           | 7 mm at 1.5 mg/disk [200]                                                         |                                                                                                                                                                   |                                            |
| Antibacterial      | <i>E. coli</i> hemorrhagic (G-)                  |                                           | 7 mm at 1.5 mg/disk [200]                                                         |                                                                                                                                                                   |                                            |
| Antibacterial      | <i>P. vulgaris</i> (G-)                          |                                           | 8 mm at 1.5 mg/disk [200]                                                         |                                                                                                                                                                   |                                            |
| Antifungal         | <i>S. typhimurium</i> (G-)<br><i>C. albicans</i> |                                           | 8 mm at 1.5 mg/disk [200]<br>7.5 mm at 1.5 mg/disk [200]                          |                                                                                                                                                                   |                                            |
| PBS                | Antitumour                                       | L1210 lymphoid leukemia                   | 0.03-0.1(Ratio of viable Leukemia Cells in test compared to control) [201]        |                                                                                                                                                                   |                                            |
| Aqueous            | Antitumour                                       | Ehrlich carcinoma                         | 69.8% inhibition <i>in vivo</i> [208]                                             |                                                                                                                                                                   |                                            |
| <i>S. fallax</i>   | Pure Compounds:                                  |                                           |                                                                                   |                                                                                                                                                                   |                                            |
|                    | Sargaquinoic acid (87)                           | Antitumour                                | P388                                                                              | IC <sub>50</sub> : 17 µM at 1 mg/mL [60]                                                                                                                          |                                            |
|                    | Sargahydroquinoic acid(69)                       | Antitumour                                | P388                                                                              | IC <sub>50</sub> : 14 µM at 1 mg/mL [60]                                                                                                                          |                                            |
|                    | Sargaquinone (86)                                | Antitumour                                | P388                                                                              | IC <sub>50</sub> : 32 µM at 1 mg/mL [60]                                                                                                                          |                                            |
|                    | Fallahydroquinone (68)                           | Antitumour                                | P388                                                                              | IC <sub>50</sub> : >27-29 µM at 1 mg/mL [60]                                                                                                                      |                                            |
|                    | Fallaquinone (83)                                | Antitumour                                | P388                                                                              | IC <sub>50</sub> : >27-29 µM at 1 mg/mL [60]                                                                                                                      |                                            |
|                    | Fallachromenoic acid (91)                        | Antitumour                                | P388                                                                              | IC <sub>50</sub> : >27-29 µM at 1 mg/mL [60]                                                                                                                      |                                            |
|                    | Sargachromenol (89)                              | Antitumour                                | P388                                                                              | IC <sub>50</sub> : >27-29 µM at 1 mg/mL [60]                                                                                                                      |                                            |
|                    | Sargaquinoic acid (87)                           | Antibacterial                             | <i>B. subtilis</i> (G+)                                                           | Slight inhibition [60]                                                                                                                                            |                                            |
|                    | Sargahydroquinoic acid (69)                      | Antibacterial                             | <i>B. subtilis</i> (G+)                                                           | Slight Inhibition [60]                                                                                                                                            |                                            |
|                    | Crude Extracts:                                  |                                           |                                                                                   |                                                                                                                                                                   |                                            |
|                    | MeOH:DCM<br>3:1                                  | Antitumour<br>Antiviral<br>Antibacterial  | P388<br><i>H. simplex</i> , Polio<br><i>B. subtilis</i> (G+)                      | IC <sub>50</sub> : 6984 ng/mL at 50 mg/mL [60]<br>Moderate [60]<br>Moderate [60]                                                                                  |                                            |

S22. Biological Activity Summary of Brown Algae (Ochrophyta) (continued)

|                     |                           |                           |                           |                         |
|---------------------|---------------------------|---------------------------|---------------------------|-------------------------|
| <i>S. paradoxum</i> | Pure Compounds:           |                           |                           |                         |
|                     | Fallaquinone (68)         | Antibacterial             | <i>S. pyogenes</i> (G+)   | 1 mm at 20 µg/disk [59] |
|                     | Sargaquinone (69)         | Antibacterial             | <i>S. aureus</i> (G+)     | 1 mm at 20 µg/disk [59] |
|                     |                           | Antibacterial             | MRSA (G+)                 | 1 mm at 20 µg/disk [59] |
|                     |                           | Antibacterial             | <i>P. aeruginosa</i> (G-) | 2 mm at 20 µg/disk [59] |
|                     |                           | Antibacterial             | <i>S. pyogenes</i> (G+)   | 3 mm at 20 µg/disk [59] |
|                     | Paradoxyhydroquinone (70) | Antibacterial             | <i>S. pyogenes</i> (G+)   | 3 mm at 20 µg/disk [59] |
|                     | (71)                      | Antibacterial             | <i>S. pyogenes</i> (G+)   | 3 mm at 20 µg/disk [59] |
|                     | Fallaquinone (83)         | Antibacterial             | <i>S. pyogenes</i> (G+)   | 4 mm at 20 µg/disk [59] |
|                     | Sargaquinone (88)         | Antibacterial             | <i>P. aeruginosa</i> (G-) | 3 mm at 20 µg/disk [59] |
|                     |                           | Antibacterial             | <i>S. pyogenes</i> (G+)   | 1 mm at 20 µg/disk [59] |
|                     | Paradoxquinol (85)        | Antibacterial             | <i>S. pyogenes</i> (G+)   | 1 mm at 20 µg/disk [59] |
|                     | Sargaquinone (87)         | Antibacterial             | <i>S. aureus</i> (G+)     | 1 mm at 20 µg/disk [59] |
|                     |                           | Antibacterial             | MRSA (G+)                 | 1 mm at 20 µg/disk [59] |
|                     |                           | Antibacterial             | <i>P. aeruginosa</i> (G-) | 1 mm at 20 µg/disk [59] |
|                     |                           | Antibacterial             | <i>S. pyogenes</i> (G+)   | 3 mm at 20 µg/disk [59] |
|                     | Paradoxquinone (82)       | Antibacterial             | <i>S. pyogenes</i> (G+)   | 2 mm at 20 µg/disk [59] |
|                     | (84)                      | Antibacterial             | <i>S. pyogenes</i> (G+)   | 2 mm at 20 µg/disk [59] |
|                     | Sargaquinone (86)         | Antibacterial             | <i>P. aeruginosa</i> (G-) | 5 mm at 20 µg/disk [59] |
|                     | Crude Extracts:           |                           |                           |                         |
|                     | Dichloromethane           | Antibacterial             | <i>S. aureus</i> (G+)     | 2 mm at 20 µg/disk [59] |
|                     |                           | Antibacterial             | MRSA (G+)                 | 1 mm at 20 µg/disk [59] |
|                     |                           | Antibacterial             | <i>S. pyogenes</i> (G+)   | 5 mm at 20 µg/disk [59] |
| Methanol            | Antibacterial             | <i>S. aureus</i> (G+)     | 1 mm at 20 µg/disk [59]   |                         |
|                     | Antibacterial             | MRSA (G+)                 | 1 mm at 20 µg/disk [59]   |                         |
|                     | Antibacterial             | <i>P. aeruginosa</i> (G-) | 10 mm at 20 µg/disk [59]  |                         |
|                     | Antibacterial             | <i>S. pyogenes</i> (G+)   | 3 mm at 20 µg/disk [59]   |                         |
|                     | Antifungal                | <i>C. albicans</i>        | 4 mm at 20 µg/disk [59]   |                         |

**S22. Biological Activity Summary of Brown Algae (Ochrophyta) (continued)**

|                            |                                |                                 |                                       |                                                                            |                                     |
|----------------------------|--------------------------------|---------------------------------|---------------------------------------|----------------------------------------------------------------------------|-------------------------------------|
| <i>U. pinnatifida</i>      | Pure Compounds:                |                                 |                                       |                                                                            |                                     |
|                            | Fucosterol (200)               | Antialzheimers                  | BACE1 inhibitor                       | IC <sub>50</sub> : 64.12 µM [209]                                          |                                     |
|                            | Fucoxanthin (329)              | Antialzheimers                  | BACE1 inhibitor                       | IC <sub>50</sub> : 5.31 µM [209]                                           |                                     |
|                            | Galactofucan sulphate          | Antiviral                       | <i>H. simplex</i> (HSV-1)             | EC <sub>50</sub> : 32µg/ mL [210]                                          |                                     |
|                            |                                | Antiviral                       | <i>H. simplex</i> (HSV-2)             | EC <sub>50</sub> : 32µg/ mL [210]                                          |                                     |
|                            | Stearidonic acid               | Antiinflammatory                | Edema                                 | IC <sub>50</sub> : 160 µg/ear [211]                                        |                                     |
|                            |                                | Antiinflammatory                | Erythema                              | IC <sub>50</sub> : 314 µg/ear [211]                                        |                                     |
|                            |                                | Antiinflammatory                | Blood Flow                            | IC <sub>50</sub> : 235 µg/ear [211]                                        |                                     |
|                            | Eicosapentaenoic Acid          | Antiinflammatory                | Edema                                 | IC <sub>50</sub> : 230 µg/ear [211]                                        |                                     |
|                            |                                | Antiinflammatory                | Erythema                              | IC <sub>50</sub> : 462 µg/ear [211]                                        |                                     |
|                            |                                | Antiinflammatory                | Blood Flow                            | IC <sub>50</sub> : 236 µg/ear [211]                                        |                                     |
|                            | Epiloliolide (65)              | Antioxidant                     | DPPH scavenging                       | IC <sub>50</sub> : 17 mM [57]                                              |                                     |
|                            |                                | Antifungal                      | <i>Candida albicans</i>               | 6.5 mm at 800 µg/mL [57]                                                   |                                     |
|                            |                                | Antibacterial                   | <i>E. coli</i> (G-)                   | 7.0 mm at 800 µg/mL [57]                                                   |                                     |
|                            |                                | Antibacterial                   | MRSA (G+)                             | 8.2 mm at 800 µg/mL [57]                                                   |                                     |
|                            |                                | Antibacterial                   | <i>S. aureus</i> (G+)                 | 7.5 mm at 800 µg/mL [57]                                                   |                                     |
|                            | Loliolide (67)                 | Allelopathic                    | <i>E. crus-galli</i> root growth      | IC <sub>50</sub> : 16.46 µM [58]                                           |                                     |
|                            | Crude Extracts:                |                                 |                                       |                                                                            |                                     |
|                            |                                | 80% Methanol                    | Antidiabetes                          | Alpha amylase inhibitor                                                    | IC <sub>50</sub> : 0.92 mg/mL [212] |
|                            |                                | 70% Acetone                     | Antidiabetes                          | Alpha amylase inhibitor                                                    | IC <sub>50</sub> : 0.81 mg/mL [212] |
|                            |                                | Aqueous                         | Antidiabetes                          | Alpha amylase inhibitor                                                    | IC <sub>50</sub> : 2.07 mg/mL [212] |
|                            |                                | Methanol (sporophyll)           | Antioxidant                           | DPPH Scavenging                                                            | 51.1 % [213]                        |
| Acetone (sporophyll)       |                                | Antioxidant                     | DPPH Scavenging                       | 8.3 % [213]                                                                |                                     |
| Chloroform (sporophyll)    |                                | Antioxidant                     | DPPH Scavenging                       | 5.4 % [213]                                                                |                                     |
| Ethyl acetate (sporophyll) |                                | Antioxidant                     | DPPH Scavenging                       | 23.5 % [213]                                                               |                                     |
| PBS                        |                                |                                 |                                       |                                                                            |                                     |
|                            |                                | Antitumour                      | Lymphoid leukemia cells               | 0.03-0.1(Ratio of viable Leukemia Cells in test compared to control) [201] |                                     |
| Fucoidan extract           |                                |                                 |                                       |                                                                            |                                     |
|                            | Antitumour                     | Ehrlich carcinoma               | 53.4% inhibition <i>in vivo</i> [208] |                                                                            |                                     |
| <i>X. chondrophylla</i>    | Pure Compounds:                |                                 |                                       |                                                                            |                                     |
|                            | Xestoaminol (298)              | Antitumour                      | HL60                                  | IC <sub>50</sub> : 8.8 µM [99]                                             |                                     |
|                            |                                | Antitumour                      | HEK                                   | IC <sub>50</sub> : 18 µM [99]                                              |                                     |
|                            |                                | Antibacterial                   | <i>S. aureus</i> (G+)                 | IC <sub>50</sub> : 17 µM [99]                                              |                                     |
|                            |                                | Antifungal                      | <i>S. cerevisiae</i>                  | IC <sub>50</sub> : 17.1 µM [99]                                            |                                     |
| Antitubercular             | <i>M. tuberculosis</i> (H37Ra) | IC <sub>50</sub> : 19.4 µM [99] |                                       |                                                                            |                                     |
| <i>Z. angustata</i>        | Crude Extracts:                |                                 |                                       |                                                                            |                                     |
|                            | Ethanol                        | Antioxidant                     | DPPH Scavenging                       | 9.4-9.6 µg GAE/10 µL [193]                                                 |                                     |
| <i>Z. spiralis</i>         | Pure Compounds:                |                                 |                                       |                                                                            |                                     |
|                            | (257)                          | Antibacterial                   | <i>B. subtilis</i> (G+)               | IC <sub>50</sub> : 2.5-10 µM [91]                                          |                                     |
|                            | (258)                          | Antibacterial                   | <i>B. subtilis</i> (G+)               | IC <sub>50</sub> : 2.5-10 µM [91]                                          |                                     |
|                            | (273)                          | Antibacterial                   | <i>B. subtilis</i> (G+)               | IC <sub>50</sub> : 2.5-10 µM [91]                                          |                                     |
|                            | (275)                          | Antibacterial                   | <i>B. subtilis</i> (G+)               | IC <sub>50</sub> : 2.5-10 µM [91]                                          |                                     |



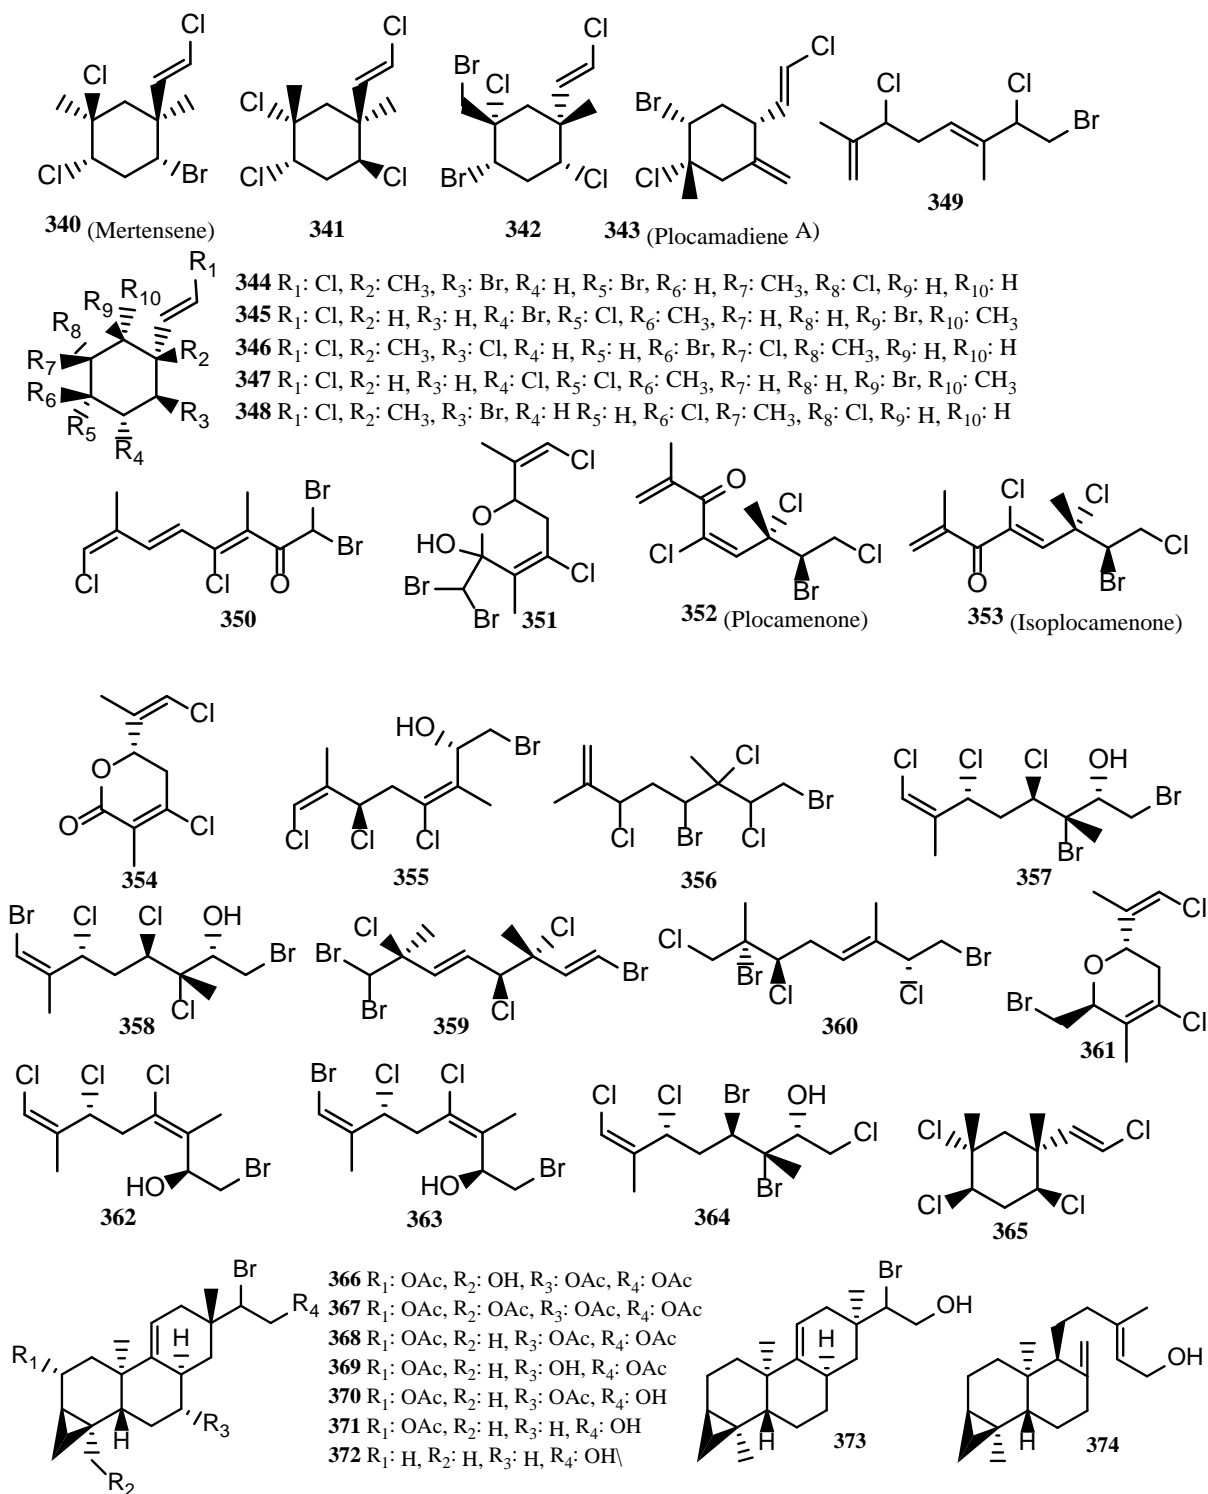

S23. Halogenated Monoterpenes and Parguerenes Isolated from Red Algae.

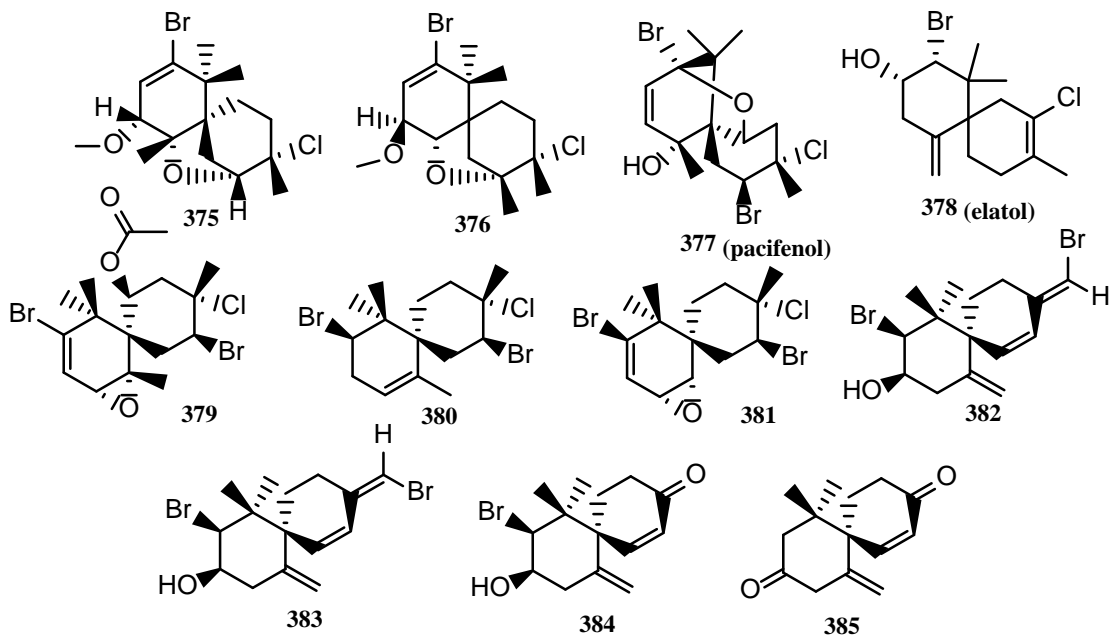

S24. Chamigrenes Isolated from Red Algae.

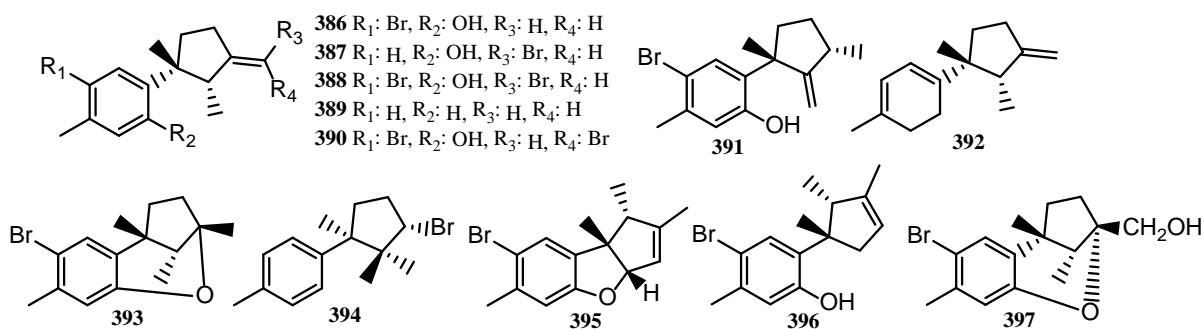

S25. Laurenes Isolated from Red Algae.

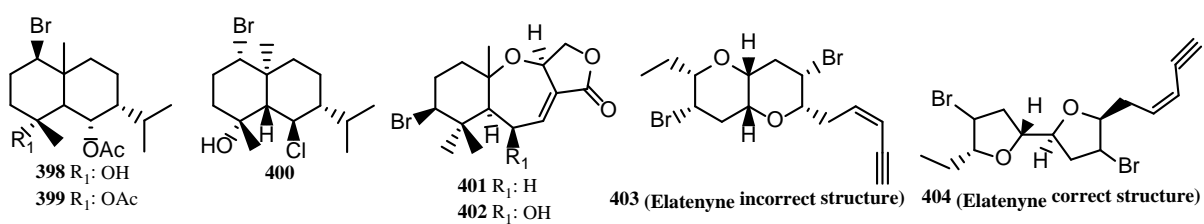

S26. Sesquiterpenes Isolated from Red Algae

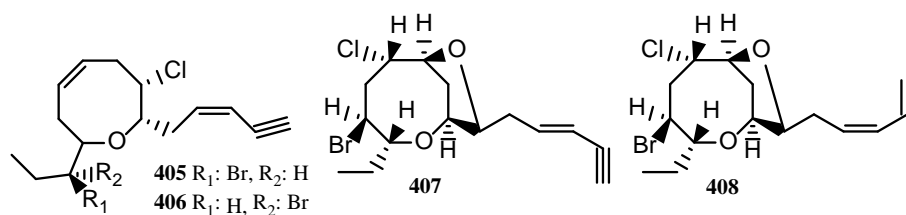

S27. Lauroxocanes Isolated from Red Algae

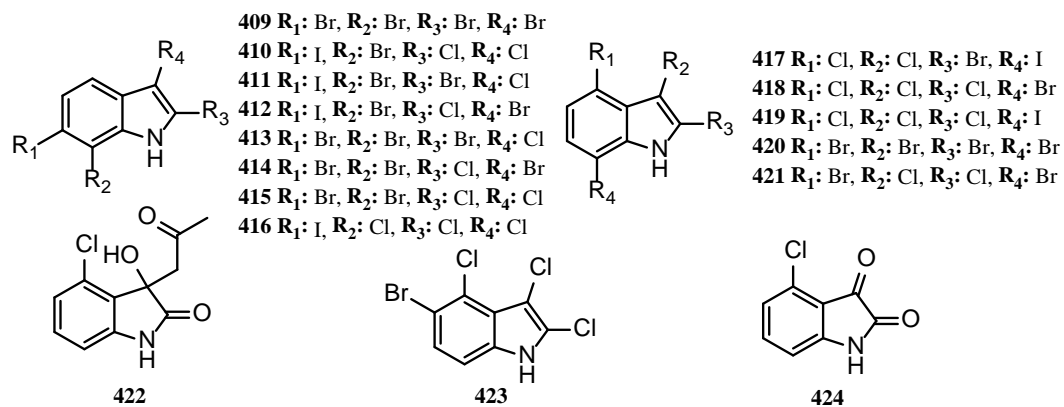

S28. Polyhalogenated Indoles Isolated from Red Algae.

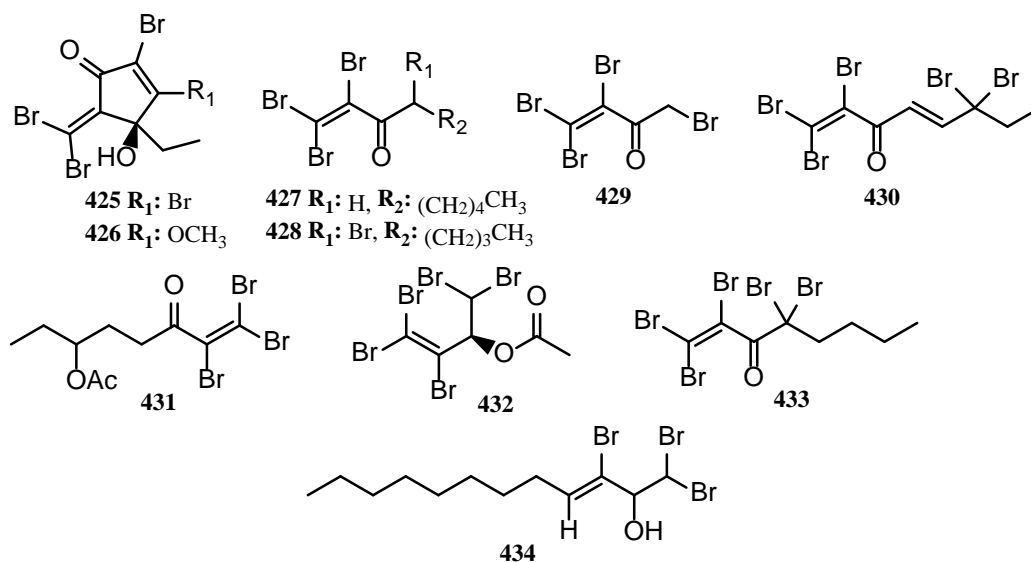

S29. Polyhalogenated Hydrocarbons Isolated from Red Algae.

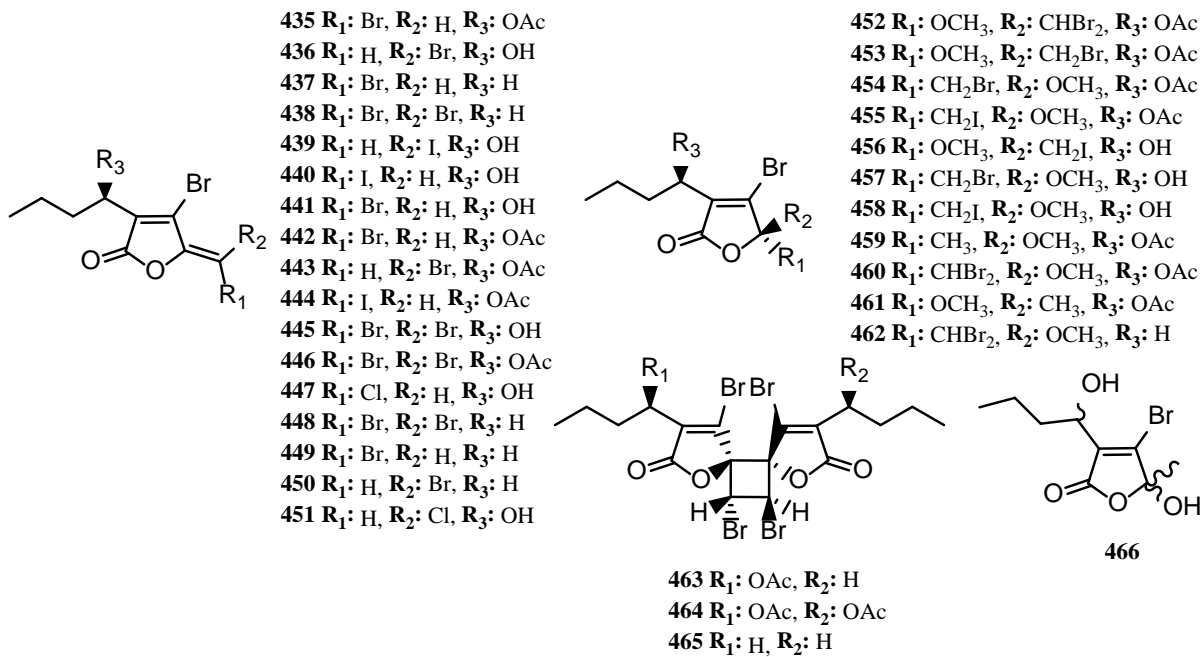

S30. Halogenated Furanones Isolated from Red Algae.

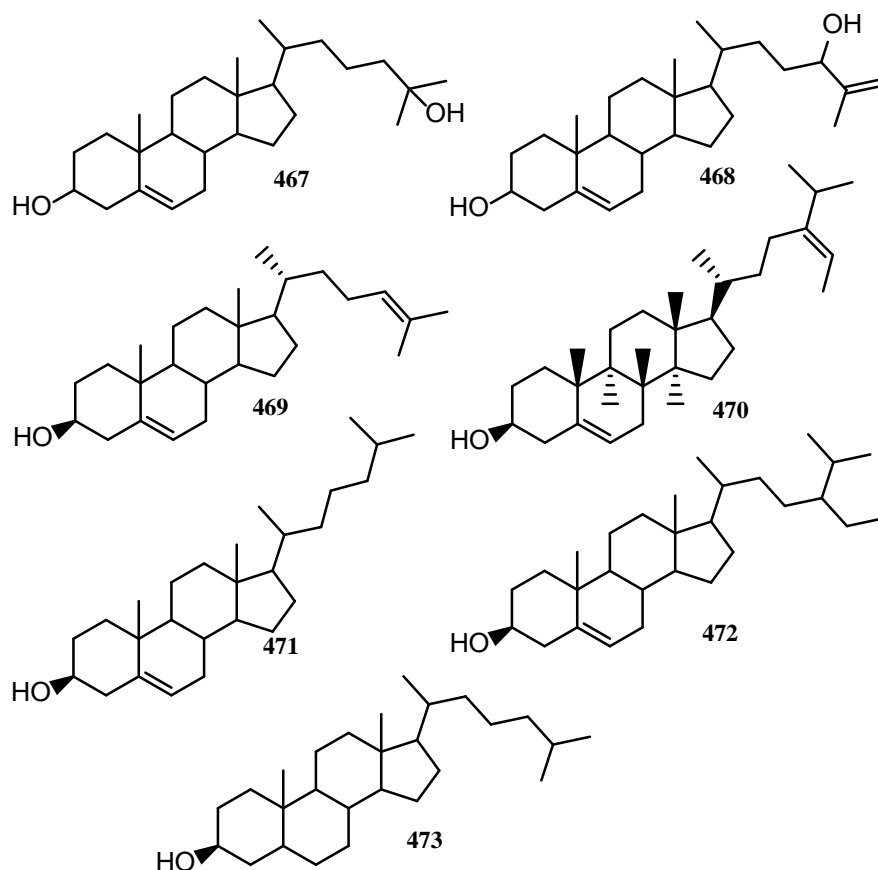

S31. Steroids Isolated from Red Algae.

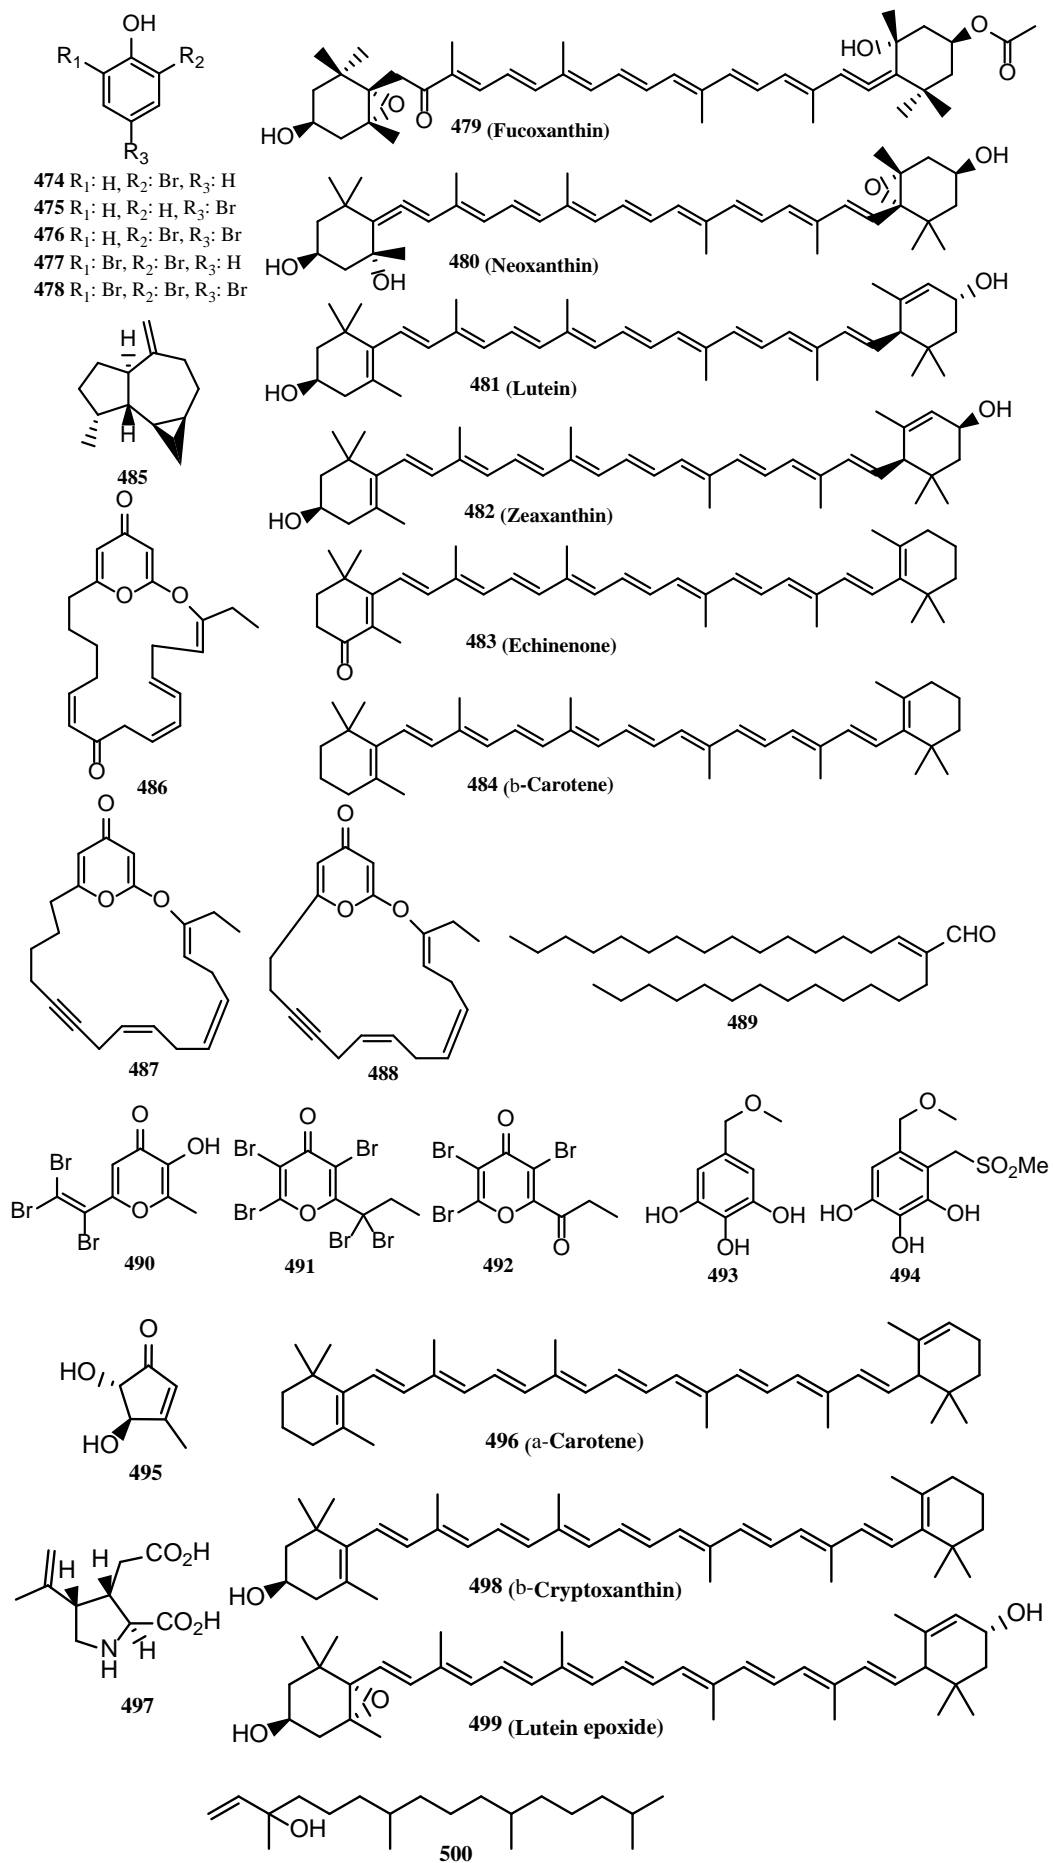

S32. Miscellaneous Classes of Compounds Isolated from Red Algae.

S33. Biological Activity Summary of Red Algae (Rhodophyta).

| Species               | Extract/Pure Compound             | Activity                        | Assay                               | Potency [Ref]                             |                                            |
|-----------------------|-----------------------------------|---------------------------------|-------------------------------------|-------------------------------------------|--------------------------------------------|
| <i>C. officinales</i> | Sulphated polysaccharide fraction | Antioxidant                     | Hydroxyl scavenging                 | IC <sub>50</sub> : 1.44 mg/mL [214]       |                                            |
|                       |                                   | Antioxidant                     | Superoxide scavenging               | IC <sub>50</sub> : 0.59 mg/mL [214]       |                                            |
|                       |                                   | Antioxidant                     | DPPH scavenging                     | IC <sub>50</sub> : 1.2 mg/mL [214]        |                                            |
| <i>D. pulchra</i>     | Pure Compounds:                   | 427                             | Antimicrobial<br>Antifungal         | <i>M. luteus</i> (G+)<br><i>P. oxalis</i> | Active at 5 µg [169]<br>5 mm at 5 µg [169] |
|                       |                                   | 431                             | Antimicrobial                       | <i>B. subtilis</i> (G+)                   | Active at 5 µg [169]                       |
|                       |                                   |                                 | Antimicrobial                       | <i>E. coli</i> (G-)                       | Active at 5 µg [169]                       |
|                       |                                   |                                 | Antifungal                          | <i>P. oxalis</i>                          | 9 mm at 5 µg [169]                         |
|                       |                                   |                                 | Anticancer                          | Tyrosine kinase inhibitor                 | %REA: 31.7% at 200 µg/mL [169]             |
|                       |                                   | 434                             | Antimicrobial                       | <i>E. coli</i> (G-)                       | Active at 10 µg [169]                      |
|                       |                                   |                                 | Antimicrobial                       | <i>M. luteus</i> (G+)                     | Active at 5 µg [169]                       |
|                       |                                   |                                 | Antimicrobial                       | <i>B. subtilis</i> (G+)                   | Active at 5 µg [169]                       |
|                       |                                   |                                 | Antifungal                          | <i>P. oxalis</i>                          | 8 mm at 5 µg [169]                         |
|                       |                                   | 455                             | Antimicrobial                       | <i>M. luteus</i> (G+)                     | Active at 5 µg [169]                       |
|                       |                                   |                                 | Anticancer                          | Epidermoid carcinoma                      | ED <sub>50</sub> : 2.4 µg/mL [169]         |
|                       |                                   |                                 | Anticancer                          | Vinblastine resistant carcinoma           | ED <sub>50</sub> : 4.1 µg/mL [169]         |
|                       |                                   |                                 | Anticancer                          | Human prostate cancer                     | ED <sub>50</sub> : 12.9 µg/mL [169]        |
|                       |                                   | 458                             | Anticancer                          | Human breast cancer                       | ED <sub>50</sub> : 12.9 µg/mL [169]        |
|                       |                                   |                                 | Antimicrobial                       | <i>E. coli</i> (G-)                       | Active at 5 µg [169]                       |
|                       |                                   |                                 | Antimicrobial                       | <i>M. luteus</i> (G+)                     | Active at 5 µg [169]                       |
|                       |                                   |                                 | Antimicrobial                       | <i>B. subtilis</i> (G+)                   | Active at 5 µg [169]                       |
|                       |                                   | 456                             | Antifungal                          | <i>P. oxalis</i>                          | 16 mm at 5 µg [169]                        |
|                       |                                   |                                 | Antimicrobial                       | <i>E. coli</i> (G-)                       | Active at 5 µg [169]                       |
|                       |                                   |                                 | Antimicrobial                       | <i>M. luteus</i> (G+)                     | Active at 5 µg [169]                       |
|                       |                                   |                                 | Antimicrobial                       | <i>B. subtilis</i> (G+)                   | Active at 10 µg [169]                      |
|                       |                                   | 459                             | Antifungal                          | <i>P. oxalis</i>                          | 6 mm at 5 µg [169]                         |
|                       |                                   |                                 | Anticancer                          | Human prostate cancer                     | ED <sub>50</sub> : 9.1 µg/mL [169]         |
|                       |                                   |                                 | Anticancer                          | Human breast cancer                       | ED <sub>50</sub> : 6.4 µg/mL [169]         |
|                       |                                   |                                 | Antimicrobial                       | <i>M. luteus</i> (G+)                     | Active at 1 µg [169]                       |
|                       |                                   | 461                             | Antifungal                          | <i>P. oxalis</i>                          | 6 mm at 5 µg [169]                         |
|                       |                                   |                                 | Anticancer                          | Human epidermoid carcinoma                | ED <sub>50</sub> : 5.4 µg/mL [169]         |
| Anticancer            | Vinblastine resistant carcinoma   |                                 | ED <sub>50</sub> : 10.7 µg/mL [169] |                                           |                                            |
| Anticancer            | Human prostate cancer             |                                 | ED <sub>50</sub> : 1.7 µg/mL [169]  |                                           |                                            |
| Anticancer            | Human breast cancer               |                                 | ED <sub>50</sub> : 2.4 µg/mL [169]  |                                           |                                            |
| Antimicrobial         | <i>M. luteus</i> (G+)             |                                 | Active at 5 µg [169]                |                                           |                                            |
| 466                   | Antimicrobial                     | <i>B. subtilis</i> (G+)         | Active at 5 µg [169]                |                                           |                                            |
|                       | Antifungal                        | <i>P. oxalis</i>                | 12 mm at 5 µg [169]                 |                                           |                                            |
|                       | Anticancer                        | Human epidermoid carcinoma      | ED <sub>50</sub> : 3.9 µg/mL [169]  |                                           |                                            |
|                       | Anticancer                        | Vinblastine resistant carcinoma | ED <sub>50</sub> : 5.6 µg/mL [169]  |                                           |                                            |
|                       | Anticancer                        | Human prostate cancer           | ED <sub>50</sub> : 3.6 µg/mL [169]  |                                           |                                            |
|                       | Anticancer                        | Human breast cancer             | ED <sub>50</sub> : 4.0 µg/mL [169]  |                                           |                                            |
|                       | Antiplasmodia                     | <i>P. falciparum</i> (D6)       | IC <sub>50</sub> : 3.8 µg/mL [169]  |                                           |                                            |
| 460                   | Antifungal                        | <i>P. oxalis</i>                | 8 mm at 5 µg [169]                  |                                           |                                            |
|                       | Anticancer                        | Human epidermoid carcinoma      | ED <sub>50</sub> : 6.1 µg/mL [169]  |                                           |                                            |
|                       | Anticancer                        | Vinblastine resistant carcinoma | ED <sub>50</sub> : 5.3 µg/mL [169]  |                                           |                                            |
|                       | Anticancer                        | Human prostate cancer           | ED <sub>50</sub> : 4.5 µg/mL [169]  |                                           |                                            |
| 452                   | Anticancer                        | Human breast cancer             | ED <sub>50</sub> : 3.8 µg/mL [169]  |                                           |                                            |
|                       | Antimicrobial                     | <i>M. luteus</i> (G+)           | Active at 5 µg [169]                |                                           |                                            |
|                       | Antimicrobial                     | <i>B. subtilis</i> (G+)         | Active at 5 µg [169]                |                                           |                                            |
|                       | Antifungal                        | <i>P. oxalis</i>                | 14 mm at 5 µg [169]                 |                                           |                                            |
|                       | Anticancer                        | Human epidermoid carcinoma      | ED <sub>50</sub> : 4.1 µg/mL [169]  |                                           |                                            |
| 452                   | Anticancer                        | Vinblastine resistant carcinoma | ED <sub>50</sub> : 3.9 µg/mL [169]  |                                           |                                            |
|                       | Anticancer                        | Human prostate cancer           | ED <sub>50</sub> : 3.6 µg/mL [169]  |                                           |                                            |
|                       | Anticancer                        | Human breast cancer             | ED <sub>50</sub> : 2.8 µg/mL [169]  |                                           |                                            |

S33. Biological Activity Summary of Red Algae (Rhodophyta) (continued)

|     |                   |                |                                 |                                     |
|-----|-------------------|----------------|---------------------------------|-------------------------------------|
| 462 | <i>D. pulchra</i> | Antimicrobial  | <i>E. coli</i> (G-)             | Active at 1 µg [169]                |
|     |                   | Antimicrobial  | <i>B. subtilis</i> (G+)         | Very Active at 5 µg [169]           |
|     |                   | Anticancer     | Human epidermoid carcinoma      | ED <sub>50</sub> : 7.6 µg/mL [169]  |
|     |                   | Anticancer     | Vinblastine resistant carcinoma | ED <sub>50</sub> : 10.5 µg/mL [169] |
|     |                   | Anticancer     | Human prostate cancer           | ED <sub>50</sub> : 6.6 µg/mL [169]  |
| 435 |                   | Anticancer     | Human breast cancer             | ED <sub>50</sub> : 6.7 µg/mL [169]  |
|     |                   | Antimicrobial  | <i>E. coli</i> (G-)             | Active at 10 µg [169]               |
|     |                   | Antimicrobial  | <i>M. luteus</i> (G+)           | Very Active at 5 µg [169]           |
|     |                   | Antimicrobial  | <i>B. subtilis</i> (G+)         | Very Active at 1 µg [169]           |
|     |                   | Antifungal     | <i>P. oxalis</i>                | 14 mm at 5 µg [169]                 |
|     |                   | Anticancer     | Human lung cancer               | ED <sub>50</sub> : 1.7 µg/mL [169]  |
|     |                   | Anticancer     | Human epidermoid carcinoma      | ED <sub>50</sub> : 0.8 µg/mL [169]  |
|     |                   | Anticancer     | Vinblastine resistant carcinoma | ED <sub>50</sub> : 2.1 µg/mL [169]  |
|     |                   | Anticancer     | Human prostate cancer           | ED <sub>50</sub> : 0.5 µg/mL [169]  |
| 443 |                   | Anticancer     | Human breast cancer             | ED <sub>50</sub> : 1.6 µg/mL [169]  |
|     |                   | Antimicrobial  | <i>M. luteus</i> (G+)           | Very Active at 5 µg [169]           |
|     |                   | Antifungal     | <i>P. oxalis</i>                | 22 mm at 5 µg [169]                 |
| 441 |                   | Antimicrobial  | <i>B. subtilis</i> (G+)         | Very Active at 1 µg [169]           |
|     |                   | Antimicrobial  | <i>E. coli</i> (G-)             | Very Active at 1 µg [169]           |
|     |                   | Antimicrobial  | <i>M. luteus</i> (G+)           | Very Active at 1 µg [169]           |
|     |                   | Antifungal     | <i>P. oxalis</i>                | 26 mm at 5 µg [169]                 |
|     |                   | Anticancer     | Human lung cancer               | ED <sub>50</sub> : 0.3 µg/mL [169]  |
|     |                   | Anticancer     | Human epidermoid carcinoma      | ED <sub>50</sub> : 0.4 µg/mL [169]  |
|     |                   | Anticancer     | Vinblastine resistant carcinoma | ED <sub>50</sub> : 3.4 µg/mL [169]  |
|     |                   | Anticancer     | Human prostate cancer           | ED <sub>50</sub> : 0.2 µg/mL [169]  |
|     |                   | Anticancer     | Human breast cancer             | ED <sub>50</sub> : <0.1 µg/mL [169] |
| 436 |                   | Antimicrobial  | <i>E. coli</i> (G-)             | Very Active at 1 µg [169]           |
|     |                   | Antimicrobial  | <i>M. luteus</i> (G+)           | Very Active at 1 µg [169]           |
|     |                   | Antimicrobial  | <i>B. subtilis</i> (G+)         | Very Active at 1 µg [169]           |
|     |                   | Antifungal     | <i>P. oxalis</i>                | 31 mm at 5 µg [169]                 |
|     |                   | Anticancer     | Human lung cancer               | ED <sub>50</sub> : 0.6 µg/mL [169]  |
|     |                   | Anticancer     | Human epidermoid carcinoma      | ED <sub>50</sub> : 0.5 µg/mL [169]  |
|     |                   | Anticancer     | Vinblastine resistant carcinoma | ED <sub>50</sub> : 0.2 µg/mL [169]  |
|     |                   | Anticancer     | Human prostate cancer           | ED <sub>50</sub> : <0.1 µg/mL [169] |
|     |                   | Anticancer     | Human breast cancer             | ED <sub>50</sub> : 0.3 µg/mL [169]  |
| 437 |                   | Antimicrobial  | <i>M. luteus</i> (G+)           | Very Active at 5 µg [169]           |
|     |                   | Antifungal     | <i>P. oxalis</i>                | 3 mm at 5 µg [169]                  |
|     |                   | Anticancer     | Human breast cancer             | ED <sub>50</sub> : 9.8 µg/mL [169]  |
|     |                   | Anticancer     | Human fibrosarcoma              | ED <sub>50</sub> : 2.2 µg/mL [169]  |
|     |                   | Anticancer     | Human melanoma                  | ED <sub>50</sub> : 5.3 µg/mL [169]  |
|     |                   | Anticancer     | Mouse lymphoid neoplasm         | ED <sub>50</sub> : <5 µg/mL [169]   |
|     |                   | Anticancer     | Human prostate cancer           | ED <sub>50</sub> : 7.3 µg/mL [169]  |
|     |                   | Anticancer     | Human breast cancer             | ED <sub>50</sub> : 10.2 µg/mL [169] |
|     |                   | Anticancer     | Human glioblastoma              | ED <sub>50</sub> : 10.0 µg/mL [169] |
| 440 |                   | Antimicrobial  | <i>E. coli</i> (G-)             | Active at 1 µg [169]                |
|     |                   | Antimicrobial  | <i>M. luteus</i> (G+)           | Very Active at 5 µg [169]           |
|     |                   | Antimicrobial  | <i>B. subtilis</i> (G+)         | Very Active at 5 µg [169]           |
|     |                   | Antifungal     | <i>P. oxalis</i>                | 18 mm at 5 µg [169]                 |
|     |                   | Anticancer     | Human lung cancer               | ED <sub>50</sub> : 1.3 µg/mL [169]  |
|     |                   | Anticancer     | Human epidermoid carcinoma      | ED <sub>50</sub> : 0.4 µg/mL [169]  |
|     |                   | Anticancer     | Vinblastine resistant carcinoma | ED <sub>50</sub> : 4.1 µg/mL [169]  |
|     |                   | Anticancer     | Human prostate cancer           | ED <sub>50</sub> : <0.1 µg/mL [169] |
|     |                   | Antiplasmodial | <i>P. falciparum</i> (D6)       | IC <sub>50</sub> : 6.8 µg/mL [169]  |
|     |                   | Anticancer     | Human breast cancer             | ED <sub>50</sub> : 0.3 µg/mL [169]  |

S33. Biological Activity Summary of Red Algae (Rhodophyta) (continued)

|                   |                       |                                    |                                     |
|-------------------|-----------------------|------------------------------------|-------------------------------------|
| 444               | Antimicrobial         | <i>E. coli</i> (G-)                | Active at 5 µg [169]                |
|                   | Antimicrobial         | <i>M. luteus</i> (G+)              | Very Active at 5 µg [169]           |
|                   | Antimicrobial         | <i>B. subtilis</i> (G+)            | Very Active at 1 µg [169]           |
|                   | Antifungal            | <i>P. oxalis</i>                   | 21 mm at 5 µg [169]                 |
|                   | Anticancer            | Human lung cancer                  | ED <sub>50</sub> : 1.5 µg/mL [169]  |
|                   | Anticancer            | Human epidermoid carcinoma         | ED <sub>50</sub> : 0.1 µg/mL [169]  |
|                   | Anticancer            | Vinblastine resistant carcinoma    | ED <sub>50</sub> : 3.6 µg/mL [169]  |
|                   | Anticancer            | Human prostate cancer              | ED <sub>50</sub> : 2.0 µg/mL [169]  |
|                   | Anticancer            | Human breast cancer                | ED <sub>50</sub> : <0.1 µg/mL [169] |
|                   | Antiplasmodial        | <i>P. falciparum</i> (D6)          | IC <sub>50</sub> : 4.6 µg/mL [169]  |
| <i>D. pulchra</i> | Antimicrobial         | <i>E. coli</i> (G-)                | Very Active at 5 µg [169]           |
|                   | Antimicrobial         | <i>M. luteus</i> (G+)              | Very Active at 5 µg [169]           |
|                   | Antimicrobial         | <i>B. subtilis</i> (G+)            | Very Active at 1 µg [169]           |
|                   | Antifungal            | <i>P. oxalis</i>                   | 18 mm at 5 µg [169]                 |
|                   | Anticancer            | Human lung cancer                  | ED <sub>50</sub> : 1.0 µg/mL [169]  |
|                   | Anticancer            | Human epidermoid carcinoma         | ED <sub>50</sub> : 0.4 µg/mL [169]  |
|                   | Anticancer            | Vinblastine resistant carcinoma    | ED <sub>50</sub> : 1.2 µg/mL [169]  |
|                   | Anticancer            | Human prostate cancer              | ED <sub>50</sub> : 3.0 µg/mL [169]  |
|                   | Anticancer            | Human breast cancer                | ED <sub>50</sub> : 0.4 µg/mL [169]  |
|                   | Antiplasmodial        | <i>P. falciparum</i> (D6)          | IC <sub>50</sub> : 4.6 µg/mL [169]  |
| 445               | Antimicrobial         | <i>E. coli</i> (G-)                | Active at 5 µg [169]                |
|                   | Antimicrobial         | <i>M. luteus</i> (G+)              | Very Active at 1 µg [169]           |
|                   | Antimicrobial         | <i>B. subtilis</i> (G+)            | Very Active at 1 µg [169]           |
|                   | Antifungal            | <i>P. oxalis</i>                   | 23 mm at 5 µg [169]                 |
|                   | Anticancer            | Human lung cancer                  | ED <sub>50</sub> : 1.7 µg/mL [169]  |
|                   | Anticancer            | Human epidermoid carcinoma         | ED <sub>50</sub> : 0.5 µg/mL [169]  |
|                   | Anticancer            | Vinblastine resistant carcinoma    | ED <sub>50</sub> : 0.6 µg/mL [169]  |
|                   | Anticancer            | Human prostate cancer              | ED <sub>50</sub> : 6.7 µg/mL [169]  |
|                   | Anticancer            | Human breast cancer                | ED <sub>50</sub> : 0.3 µg/mL [169]  |
|                   | Antiplasmodial        | <i>P. falciparum</i> (D6)          | IC <sub>50</sub> : 2.8 µg/mL [169]  |
| 446               | Antimicrobial         | <i>E. coli</i> (G-)                | Active at 5 µg [169]                |
|                   | Antimicrobial         | <i>M. luteus</i> (G+)              | Active at 5 µg [169]                |
|                   | Antimicrobial         | <i>B. subtilis</i> (G+)            | Very Active at 1 µg [169]           |
|                   | Antifungal            | <i>P. oxalis</i>                   | 14 mm at 5 µg [169]                 |
|                   | Anticancer            | Human lung cancer                  | ED <sub>50</sub> : 1.1 µg/mL [169]  |
|                   | Anticancer            | Human epidermoid carcinoma         | ED <sub>50</sub> : 0.3 µg/mL [169]  |
|                   | Anticancer            | Vinblastine resistant carcinoma    | ED <sub>50</sub> : 0.5 µg/mL [169]  |
|                   | Anticancer            | Human prostate cancer              | ED <sub>50</sub> : 2.1 µg/mL [169]  |
|                   | Anticancer            | Human breast cancer                | ED <sub>50</sub> : <0.1 µg/mL [169] |
|                   | Antiplasmodial        | <i>P. falciparum</i> (D6)          | IC <sub>50</sub> : 2.2 µg/mL [169]  |
| 438               | Antimicrobial         | <i>E. coli</i> (G-)                | Active at 5 µg [169]                |
|                   | Antimicrobial         | <i>M. luteus</i> (G+)              | Very Active at 5 µg [169]           |
|                   | Antimicrobial         | <i>B. subtilis</i> (G+)            | Very Active at 5 µg [169]           |
|                   | Antifungal            | <i>P. oxalis</i>                   | 13 mm at 5 µg [169]                 |
|                   | Anticancer            | Human breast cancer                | ED <sub>50</sub> : 6.4 µg/mL [169]  |
|                   | Anticancer            | Human lung cancer                  | ED <sub>50</sub> : 10.3 µg/mL [169] |
|                   | Anticancer            | Human melanoma                     | ED <sub>50</sub> : 4.2 µg/mL [169]  |
|                   | Anticancer            | Human colon cancer                 | ED <sub>50</sub> : 12.4 µg/mL [169] |
|                   | Anticancer            | Mouse lymphoid neoplasm            | ED <sub>50</sub> : >5 µg/mL [169]   |
|                   | Anticancer            | Human epidermoid carcinoma         | ED <sub>50</sub> : 10.5 µg/mL [169] |
| Anticancer        | Human prostate cancer | ED <sub>50</sub> : 9.3 µg/mL [169] |                                     |
| Anticancer        | Human breast cancer   | ED <sub>50</sub> : 8.6 µg/mL [169] |                                     |
| <i>L. elata</i>   | Pure Compounds:       |                                    |                                     |
|                   | Antitumour            | HeLa                               | IC <sub>50</sub> : 1.3 µM [132]     |
|                   | Antitumour            | Hep-2                              | IC <sub>50</sub> : 2.0 µM [132]     |
|                   | Antifouling           | <i>Alteromonas</i> sp1.            | 25-30 mm at 30 µg/disc [134]        |
|                   | Antifouling           | <i>Alteromonas</i> sp2.            | 12-18 mm at 30 µg/disc [134]        |
|                   | Antifouling           | <i>Proteus mirabilis</i>           | 12-18 mm at 30 µg/disc [134]        |
|                   | Antifouling           | <i>Proteus</i> sp.                 | 7-12 mm at 30 µg/disc [134]         |
|                   | Antifouling           | <i>Cytophaga-flavobacterium</i>    | 25-30 mm at 30 µg/disc [134]        |
|                   | Antifouling           | <i>Vibrio</i> sp.                  | 25-30 mm at 30 µg/disc [134]        |
|                   | Antibacterial         | <i>S. aureus</i> (G+)              | 12-18 mm at 30 µg/disc [134]        |



**S33. Biological Activity Summary of Red Algae (Rhodophyta) (continued)**

|                        |                                   |                                                                                                                                                                                                                                                                                                                                                                                 |                                                                                                                                                                                                                                                                                                                                                                                                                                             |                                                                                                                                                                                                                                                                                                                                                                                                                                                                                                                                                                                   |                                                                                                                                                                                                                                                                                                                                                                                                                                                                                                                                                                                                                                                                                                                                                                                                                           |
|------------------------|-----------------------------------|---------------------------------------------------------------------------------------------------------------------------------------------------------------------------------------------------------------------------------------------------------------------------------------------------------------------------------------------------------------------------------|---------------------------------------------------------------------------------------------------------------------------------------------------------------------------------------------------------------------------------------------------------------------------------------------------------------------------------------------------------------------------------------------------------------------------------------------|-----------------------------------------------------------------------------------------------------------------------------------------------------------------------------------------------------------------------------------------------------------------------------------------------------------------------------------------------------------------------------------------------------------------------------------------------------------------------------------------------------------------------------------------------------------------------------------|---------------------------------------------------------------------------------------------------------------------------------------------------------------------------------------------------------------------------------------------------------------------------------------------------------------------------------------------------------------------------------------------------------------------------------------------------------------------------------------------------------------------------------------------------------------------------------------------------------------------------------------------------------------------------------------------------------------------------------------------------------------------------------------------------------------------------|
| <i>L. elata</i>        | Pacifenol (377)<br>(381)          | Cytotoxicity<br>Cytotoxicity                                                                                                                                                                                                                                                                                                                                                    | Brine Shrimp Assay<br>Brine Shrimp Assay                                                                                                                                                                                                                                                                                                                                                                                                    | Significant at 23 µg/mL [136]<br>Moderate at 23 µg/mL [136]                                                                                                                                                                                                                                                                                                                                                                                                                                                                                                                       |                                                                                                                                                                                                                                                                                                                                                                                                                                                                                                                                                                                                                                                                                                                                                                                                                           |
|                        | Crude Extract:<br>MeOH:DCM<br>3:1 | Antiviral<br>Antitumour<br>Antifungal                                                                                                                                                                                                                                                                                                                                           | <i>Herpes simplex</i> , Polio<br>P388<br><i>Trichophyton mentagrophytes</i>                                                                                                                                                                                                                                                                                                                                                                 | ~ [131]<br>IC <sub>50</sub> : 168,632 ng/mL [131]<br>~ [131]                                                                                                                                                                                                                                                                                                                                                                                                                                                                                                                      |                                                                                                                                                                                                                                                                                                                                                                                                                                                                                                                                                                                                                                                                                                                                                                                                                           |
|                        | <i>L. filiformis</i>              | Pure Compounds:<br>(366 and 367)<br>Filiformin (393)<br>Filiforminol (397)<br>Allolaurinterol (386)<br>Bromolaurenisol (390)<br>(392)<br>Pre-pacifinol<br>(367)<br>(367)<br>(367)<br>(367)<br>(367)<br>(366)<br>(366)<br><br>Pacifenol (377)<br>(379)<br>(380)<br>(381)<br>(390)<br>(386)<br>(386)<br>(386)<br><br>(401)<br>(405)<br><br>Crude Extracts:<br><br>MeOH:DCM<br>3:1 | P-gp Inhibitor<br>Antitumour<br>Antitumour<br>Antitumour<br>Antitumour<br>Cytotoxicity<br>Antibacterial<br>Antitumour<br>Antitumour<br>Antifeedant<br>Antifeedant<br>Antifeedant<br><br>Antitumour<br>Anthelmintic<br><br>Cytotoxicity<br>Cytotoxicity<br>Cytotoxicity<br>Cytotoxicity<br>Cytotoxicity<br>Antibacterial<br>Antibacterial<br>Antitubercular<br><br>Antitumour<br>Antifeedant<br><br>Antiviral<br>Antibacterial<br>Antifungal | P-glycoprotein<br>P388<br>P388<br>P388<br>P388<br>Brine shrimp mortality<br><i>S. aureus</i> 12600 (G+)<br>P388<br>HeLa<br><i>Haliothis discus hannai</i><br><i>S. nudus</i><br><i>S. intermedius</i><br><br>Ehrlich carcinoma<br><i>caliginosa</i><br><br>Brine Shrimp Assay<br>Brine Shrimp Assay<br>Brine Shrimp Assay<br>Brine Shrimp Assay<br>NSCLC-N6<br><i>S. aureus</i> (G+)<br>VCM <i>E. faecium</i><br><i>M. tuberculosis</i><br><br>P388<br><i>X. helleri</i> (Swordtail fish)<br><br><i>H. simplex</i> , Polio<br><i>B. subtilis</i> (G+)<br><i>T. mentagrophytes</i> | ~ [126]<br>IC <sub>50</sub> : >43 µM [144]<br>IC <sub>50</sub> : >40 µM [144]<br>IC <sub>50</sub> : >43 µM [144]<br>IC <sub>50</sub> : >34 µM [144]<br>90% mortality at 23 µg/mL [136]<br>10-100µg/mL full inhibition 48h[215]<br>IC <sub>50</sub> : 8.5 µg/mL [127]<br>IC <sub>50</sub> : 6.3 µg/mL [127]<br>Ei: 0.88 at 75 µg [128]<br>Ei: 0.92 at 75 µg [128]<br>Ei: 0.97 at 75 µg [128]<br><br>90% inhibition at 50 µg/mL [129]<br>significant at 10 % (w/v) [129]<br><br>Significant at 23 µg/mL [136]<br>Moderate at 23 µg/mL [136]<br>Moderate at 23 µg/mL [136]<br>Moderate at 23 µg/mL [136]<br>IC <sub>50</sub> : 26.5 µM [145]<br>2xMIC: 6.25 µg/mL [146]<br>moderate [146]<br>moderate [147]<br><br>T/C 175 at 400 mg/kg [151]<br>Significant [161]<br><br>Moderate [144]<br>Moderate [144]<br>Moderate [144] |
|                        | <i>P. angustum</i>                | Pure Compounds:<br>Plocamenone (352)<br>Plocamenone (352)<br>Plocamenone (352)<br><br>Mixture:<br>Plocamenone (352) +<br>isoplocamenone (353)<br><br>Crude Extracts:<br><br>MeOH:DCM<br>3:1                                                                                                                                                                                     | Antitumour<br>Antitumour<br>Antitumour<br><br>Antitumour<br><br>Antitumour<br>Antiviral<br>Antibacterial<br>Antifungal<br>Antifungal<br>Antifungal                                                                                                                                                                                                                                                                                          | P388<br>P388<br>P388<br><br>P388<br><br>P388<br><i>H. simplex</i> , Polio<br><i>B. subtilis</i> (G+)<br><i>T. mentagrophytes</i><br><i>C. albicans</i><br><i>T. mentagrophytes</i><br><i>C. resinae</i>                                                                                                                                                                                                                                                                                                                                                                           | IC <sub>50</sub> : 157.5 ng/mL [120]<br>IC <sub>50</sub> : <97.5 ng/mL [120]<br>IC <sub>50</sub> : <97.5 ng/mL [120]<br><br>IC <sub>50</sub> : <97.5 ng/mL [120]<br><br>IC <sub>50</sub> : <4875 ng/mL [120]<br>IC <sub>50</sub> : <4875 ng/mL [120]<br>IC <sub>50</sub> : 22,743 ng/mL [120]<br>~ [120]<br>15 mm at 50 mg/mL [120]<br>10 mm at 50 mg/mL [120]<br>10 mm at 50 mg/mL [120]<br>20 mm at 50 mg/mL [120]                                                                                                                                                                                                                                                                                                                                                                                                      |
| <i>P. australasica</i> | Pure Compounds:<br>425<br>490     | Cytotoxic<br>Cytotoxic                                                                                                                                                                                                                                                                                                                                                          | PC3 cells<br>PC3 cells                                                                                                                                                                                                                                                                                                                                                                                                                      | IC <sub>50</sub> : 0.44 µM [166]<br>IC <sub>50</sub> : 10.0 µM [166]                                                                                                                                                                                                                                                                                                                                                                                                                                                                                                              |                                                                                                                                                                                                                                                                                                                                                                                                                                                                                                                                                                                                                                                                                                                                                                                                                           |
| <i>P. leptophyllum</i> | Pure Compounds:<br><br>365        | Antifeedant<br>Antifeedant<br>Antifeedant<br>Antifeedant                                                                                                                                                                                                                                                                                                                        | <i>T. cornutus</i><br><i>O. pfeifferi</i><br><i>H. discus</i><br><i>S. intermedius</i>                                                                                                                                                                                                                                                                                                                                                      | Active at 40 µg [124]<br>Active at 40 µg [124]<br>Active at 40 µg [124]<br>Active at 40 µg [124]                                                                                                                                                                                                                                                                                                                                                                                                                                                                                  |                                                                                                                                                                                                                                                                                                                                                                                                                                                                                                                                                                                                                                                                                                                                                                                                                           |

S33. Biological Activity Summary of Red Algae (Rhodophyta) (continued)

|                                    |                  |              |                          |                                        |                                  |
|------------------------------------|------------------|--------------|--------------------------|----------------------------------------|----------------------------------|
| <i>P. mertensii</i>                | Pure Compounds:  |              |                          |                                        |                                  |
|                                    | (342)            | Antifeedant  | and                      | <i>Spodoptera frugiperda</i>           | 94% mortality at 1000 ppm [117]  |
|                                    |                  | Insecticidal |                          | <i>Diabrotica undecimpunctata</i>      | 100% mortality at 1000 ppm [117] |
|                                    |                  |              |                          | <i>Tetranychus urticae</i>             | 100% mortality at 1000 ppm [117] |
|                                    |                  |              |                          | <i>Alphis fabae</i>                    | 100% mortality at 1000 ppm [117] |
|                                    |                  | Antifungal   |                          | Apple scab                             | 72% mortality at 100 ppm [117]   |
|                                    |                  | Antifungal   |                          | Broad Bean botrytis                    | 73% mortality at 100 ppm [117]   |
|                                    | Mertensene (340) | Antifeedant  | and                      | <i>Spodoptera frugiperda</i>           | 40% mortality at 1000 ppm [117]  |
|                                    |                  | Insecticidal |                          | <i>Alphis fabae</i>                    | 79% mortality at 1000 ppm [117]  |
|                                    |                  | Antifungal   |                          | <i>Tetranychus urticae</i>             | 42% mortality at 1000 ppm [117]  |
| Crude Extracts:<br>MeOH:DCM<br>3:1 |                  |              | Grape downy mildew       | 59% mortality at 100 ppm [117]         |                                  |
|                                    | Antitumour       |              | P388                     | IC <sub>50</sub> : 254,448 ng/mL [116] |                                  |
|                                    | Antiviral        |              | <i>H. simplex</i>        | Slight [116]                           |                                  |
|                                    | Antifungal       |              | <i>T. mentagrophytes</i> | Slight [116]                           |                                  |
| <i>R. membranacea</i>              | Pure Compounds:  |              |                          |                                        |                                  |
|                                    | 409              | Anticancer   | HL-60                    | IC <sub>50</sub> : 38 µM [163]         |                                  |
|                                    | 413              | Anticancer   | HL-60                    | IC <sub>50</sub> : 78 µM [163]         |                                  |
|                                    | 415              | Anticancer   | HL-60                    | IC <sub>50</sub> : 61 µM [163]         |                                  |
|                                    | 410              | Anticancer   | HL-60                    | IC <sub>50</sub> : 49 µM [163]         |                                  |
|                                    | 421              | Anticancer   | HL-60                    | IC <sub>50</sub> : 28 µM [163]         |                                  |
|                                    | 424              | Anticancer   | HL-60                    | IC <sub>50</sub> : 61 µM [163]         |                                  |
|                                    | 409              | Antifungal   | <i>S. cerevisiae</i>     | IC <sub>50</sub> : 61 µM [163]         |                                  |
|                                    | 413              | Antifungal   | <i>S. cerevisiae</i>     | IC <sub>50</sub> : 61 µM [163]         |                                  |
|                                    | 415              | Antifungal   | <i>S. cerevisiae</i>     | IC <sub>50</sub> : 61 µM [163]         |                                  |
|                                    | 410              | Antifungal   | <i>S. cerevisiae</i>     | IC <sub>50</sub> : 61 µM [163]         |                                  |
|                                    | 421              | Antifungal   | <i>S. cerevisiae</i>     | IC <sub>50</sub> : 61 µM [163]         |                                  |
|                                    | 424              | Antifungal   | <i>S. cerevisiae</i>     | IC <sub>50</sub> : 61 µM [163]         |                                  |
